# Supplementary material for: Unveiling the intramolecular [3 + 2] cycloaddition reactions ofC,N-disubstituted nitrones from the molecular electron density theory perspective
Source: Royal Society of Chemistry journal article supplement (doi:10.1039/d2nj00888b), 2022-01-01
Supplement: d2nj00888b1.pdf [file d2nj00888b1.pdf]

## Unveiling intramolecular [3+2] cycloaddition reactions of *C,N*-disubstituted nitrones with a molecular electron density theory perspective

Nivedita Acharjee<sup>1\*</sup>, Asmita Mondal<sup>1</sup>, Mrinmoy Chakraborty<sup>2</sup>

<sup>1</sup>*Department of Chemistry, Durgapur Government College, Durgapur-713214, West Bengal, India.*

<sup>2</sup>*Department of Electronics and Communication Engineering, Dr. B. C. Roy Engineering College, Durgapur-713206, West Bengal, India*

\* For Correspondence: E mail: [nivchem@gmail.com](mailto:nivchem@gmail.com)

### Index

- S2** BET study of the IM32CA reaction of nitrone **15**
- S5** BET study of the IM 32CA reaction of nitrone **18**
- S7** References
- S8** Table with the MPWB1K/6-311G(d,p) calculated electronic energies (au) in gas phase and toluene of the stationary points involved in the IM32CA reactions of nitrones **15, 18, 20, 24** and **26**
- S9** Table with the MPWB1K/6-311G(d,p) calculated enthalpies (au), entropies (Calmol<sup>-1</sup>K<sup>-1</sup>) and Gibbs free energies (au), computed at 298 K in toluene of the stationary points involved in the IM32CA reactions of nitrones **15, 18, 20, 24** and **26**
- S10** MPWB1K/6-311G(d,p) gas phase computed Cartesian coordinates of the stationary points involved in the IM32CA reactions of nitrones **15, 18, 20, 24** and **26** in gas phase
- S31** MPWB1K/6-311G(d,p) computed Cartesian coordinates of the stationary points involved in the IM32CA reactions of nitrones **15, 18, 20, 24** and **26** in toluene

*BET study of the IM32CA reaction of nitrene 15*

The electronic rearrangement associated along the reaction path have been established by applying the Bonding evolution theory (BET) proposed by Krokoidis<sup>1</sup> from the conjunction of ELF topological analysis<sup>2,3</sup> and Thom's Catastrophe Theory<sup>4</sup> for several chemical reactions<sup>5</sup>. Herein, the BET of the IM32CA reaction of nitrene **15** has been studied, which can be divided into nine ELF topological phases (see Table S1).

*Phase I* starts at **S<sub>0</sub>-I**,  $d_{C3-C4} = 2.84 \text{ \AA}$  and  $d_{O1-C5} = 2.64 \text{ \AA}$ , which corresponds with the first structure of the IRC. ELF of **S<sub>0</sub>-I** is similar to that of the nitrene **15** (see Table 1), showing the presence of monosynaptic basins,  $V(O1)$  and  $V'(O1)$  associated with the non bonding electron density on the O1 oxygen and the disynaptic basins,  $V(N2,C3)$ ,  $V(N2,O1)$  and  $V(C4,C5)$ ;  $V'(C4,C5)$ , respectively associated with the N2-C3, N2-O1 and C4-C5 bonding regions.

*Phase II* starts at **S<sub>1</sub>-I**,  $d_{C3-C4} = 2.43 \text{ \AA}$  and  $d_{O1-C5} = 2.34 \text{ \AA}$  and is associated with the creation of the monosynaptic  $V(N2)$  basin integrating 0.85 e associated with the non bonding electron density at N2 nitrogen. Note that the disynaptic  $V(N2,C3)$  experiences depopulation of 0.69 e from 3.69 e at **S<sub>0</sub>-I** to 3.00 e at **S<sub>1</sub>-I**, while the  $V(N2,O1)$  disynaptic basin is depopulated by 0.08 e from 1.46 e at **S<sub>0</sub>-I** to 1.38 e at **S<sub>1</sub>-I**, suggesting that the non-bonding electron density at N2 is created by deriving the electron density mainly from the N2-C3 bonding region. This electronic change demands the energy cost (EC) of 20.0 kcal mol<sup>-1</sup>.

The short *Phase III* starts at **S<sub>2</sub>-I**,  $d_{C3-C4} = 2.24 \text{ \AA}$  and  $d_{O1-C5} = 2.22 \text{ \AA}$ . The disynaptic  $V(C4,C5)$  and  $V'(C4,C5)$  disynaptic basins present at **S<sub>1</sub>-I** are merged into one disynaptic basins  $V(C4,C5)$  integrating at 3.20 e, suggesting the rupture of the C4-C5 double bond by the EC of 25.2 kcal mol<sup>-1</sup>.

*Phase IV* starts at **S<sub>3</sub>-I**,  $d_{C3-C4} = 2.19 \text{ \AA}$  and  $d_{O1-C5} = 2.18 \text{ \AA}$ , which is characterized by the creation of a new  $V(C3)$  monosynaptic basin, integrating 0.34 e, associated with the formation of the *pseudoradical* centre at C3 carbon. The electron density for the creation of the *pseudoradical* centre mainly comes from the depopulation of the N2-C3 bonding region integrating 2.73 e at **S<sub>2</sub>-I** to 2.42 e at **S<sub>3</sub>-I**. In this phase, **TS1** is found. These bonding changes demand an energy cost of 26.0 kcal·mol<sup>-1</sup> and the GEDT in *phase IV* is 0.04 e indicating a non-polar process consistent with the high activation energy barrier required for the formation of non-bonding electron density at N2 nitrogen, rupture of the C4-C5 bond and creation of the *pseudoradical* centre at C3.

**Table S1.** ELF valence basin populations, distances of the forming bonds, and relative electronic energies of the IRC structures **S<sub>0</sub>-I** – **S<sub>8</sub>-I** defining the nine phases characterizing the molecular mechanism of the IM32CA reaction of **15**. Distances are given in angstroms, Å, and relative energies in kcal·mol<sup>-1</sup>.

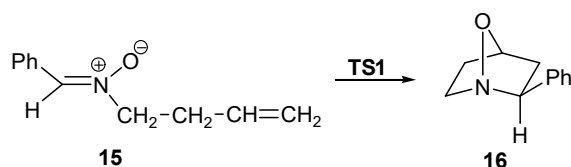

| Phases     | <i>I</i>               | <i>II</i>              | <i>III</i>             | <i>IV</i>              | <i>V</i>               | <i>VI</i>              | <i>VII</i>             | <i>VIII</i>            | <i>IX</i>              |           |
|------------|------------------------|------------------------|------------------------|------------------------|------------------------|------------------------|------------------------|------------------------|------------------------|-----------|
| Structures | <b>S<sub>0</sub>-I</b> | <b>S<sub>1</sub>-I</b> | <b>S<sub>2</sub>-I</b> | <b>S<sub>3</sub>-I</b> | <b>S<sub>4</sub>-I</b> | <b>S<sub>5</sub>-I</b> | <b>S<sub>6</sub>-I</b> | <b>S<sub>7</sub>-I</b> | <b>S<sub>8</sub>-I</b> | <b>16</b> |
| d(C3-C4)   | 2.840                  | 2.426                  | 2.243                  | 2.193                  | 2.091                  | 1.959                  | 1.943                  | 1.791                  | 1.750                  | 1.550     |
| d(O1-C5)   | 2.638                  | 2.337                  | 2.215                  | 2.182                  | 2.115                  | 2.023                  | 2.011                  | 1.879                  | 1.836                  | 1.422     |
| ΔE         | 0.0                    | 20.0                   | 25.2                   | 26.0                   | 26.2                   | 22.3                   | 21.4                   | 9.7                    | 5.3                    | -24.9     |
| GEDT       | 0.005                  | 0.004                  | 0.028                  | 0.040                  | 0.071                  | 0.121                  | 0.128                  | 0.194                  | 0.212                  | 0.291     |
| V(O1)      | 2.92                   | 2.92                   | 2.92                   | 2.92                   | 2.92                   | 2.90                   | 2.90                   | 2.91                   | 2.81                   | 2.49      |
| V'(O1)     | 2.99                   | 2.97                   | 2.95                   | 2.94                   | 2.92                   | 2.91                   | 2.92                   | 2.83                   | 2.79                   | 2.50      |
| V''(O1)    |                        |                        |                        |                        |                        |                        |                        | 0.07                   |                        |           |
| V(N2,C3)   | 3.69                   | 3.00                   | 2.73                   | 2.42                   | 2.24                   | 2.09                   | 2.07                   | 1.95                   | 1.93                   | 1.82      |
| V'(N2,O1)  | 1.46                   | 1.38                   | 1.31                   | 1.29                   | 1.25                   | 1.20                   | 1.19                   | 1.13                   | 1.13                   | 0.97      |
| V(C4,C5)   | 1.68                   | 1.66                   | 3.20                   | 3.17                   | 2.79                   | 2.51                   | 2.46                   | 2.21                   | 2.16                   | 1.93      |
| V'(C4,C5)  | 1.73                   | 1.65                   |                        |                        |                        |                        |                        |                        |                        |           |
| V(N2)      |                        | 0.85                   | 1.36                   | 1.48                   | 1.69                   | 1.92                   | 1.95                   | 2.15                   | 2.19                   | 2.40      |
| V(C3)      |                        |                        |                        | 0.28                   | 0.44                   |                        |                        |                        |                        |           |
| V(C4)      |                        |                        |                        |                        | 0.34                   |                        |                        |                        |                        |           |
| V(C5)      |                        |                        |                        |                        |                        |                        | 0.05                   | 0.19                   |                        |           |
| V(C3,C4)   |                        |                        |                        |                        |                        | 1.16                   | 1.20                   | 1.50                   | 1.56                   | 1.84      |
| V(O1,C5)   |                        |                        |                        |                        |                        |                        |                        |                        | 0.43                   | 1.29      |

*Phase V* starts at **S<sub>4</sub>-I**,  $d_{C3-C4} = 2.09$  Å and  $d_{O1-C5} = 2.12$  Å, which is characterized by the creation of a new V(C4) monosynaptic basin, integrating 0.34 e, associated with the formation of a *pseudoradical* center at the C4 carbon. The V(C4,C5) disynaptic basin experiences a depopulation of 0.38 e along *Phase V* to create this *pseudoradical* centre.

*Phase VI* starts at **S<sub>5</sub>-I**,  $d_{C3-C4} = 1.96$  Å and  $d_{O1-C5} = 2.02$  Å, At the beginning of this phase the first more relevant change along the IRC takes place. At this structure, while the V(C3) and V(C4) monosynaptic basins present at **S<sub>4</sub>-I** are missing, a new V(C3,C4) disynaptic basin, integrating 1.16 e, is created. This topological change indicates that the formation of the first C3-C4 single bond has begun at a C–C distance of 1.96 Å.

*Phase VII* starts at **S<sub>6</sub>-I**,  $d_{\text{C3-C4}} = 1.94 \text{ \AA}$  and  $d_{\text{O1-C5}} = 2.01 \text{ \AA}$ , which is characterized by the creation of a new  $V(\text{C5})$  monosynaptic basin, integrating  $0.05 e$ , associated with the formation of a *pseudoradical* center at the C5 carbon. The  $V(\text{C4,C5})$  disynaptic basin experiences a depopulation of  $0.05 e$  along *Phase VII* to create this *pseudoradical* centre.

*Phase VIII* starts at **S<sub>7</sub>-I**,  $d_{\text{C3-C4}} = 1.79 \text{ \AA}$  and  $d_{\text{O1-C5}} = 1.88 \text{ \AA}$ , which is characterized by the creation of a new  $V''(\text{O1})$  monosynaptic basin integrating  $0.07 e$  associated with the non-bonding electron density at O1 oxygen.

*Phase IX* starts at **S<sub>8</sub>-I**,  $d_{\text{C3-C4}} = 1.75 \text{ \AA}$  and  $d_{\text{O1-C5}} = 1.84 \text{ \AA}$ . At the beginning of this phase the second relevant change along the IRC takes place. At this structure, while the  $V(\text{C5})$  and  $V''(\text{O1})$  monosynaptic basins present at **S<sub>7</sub>-I** are missing, a new  $V(\text{O1,C5})$  disynaptic basin, integrating  $0.43 e$ , is created. This topological change indicates that the formation of the second O1-C5 single bond has begun at a C–O distance of  $1.84 \text{ \AA}$ . Note that the formation of the second O1-C5 bond starts, when the first C3-C4 bond has been formed by 85%, suggesting a highly asynchronous C-C and C-O bond formation, which is not depicted from the geometrical parameters at the early TSs. The molecular geometry is finally relaxed in the isoxazolidine **16**, with the  $V(\text{C3,C4})$  and  $V(\text{O1,C5})$  integrating the electron density of  $1.84 e$  and  $1.29 e$  respectively. The electron localization domains at the selected IRC points **S<sub>0</sub>-I** to **S<sub>8</sub>-I** are shown in Figure S1.

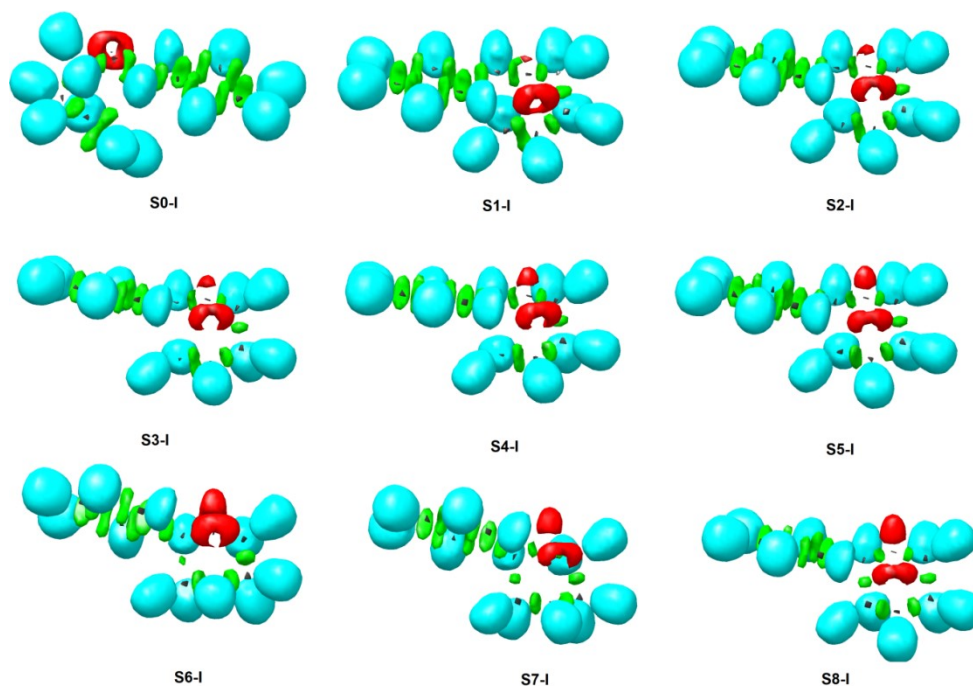

**Figure S1.** ELF localization domains (Isovalue = 0.84) of **S<sub>0</sub>-I** to **S<sub>8</sub>-I**

*BET study of the IM32CA reaction of nitrene 20*

Herein, the BET of the IM32CA reaction of nitrene **20** has been studied, which can be divided into six ELF topological phases (see Table S2).

*Phase I* starts at **S<sub>0-II</sub>**,  $d_{C3-C4} = 3.00 \text{ \AA}$  and  $d_{O1-C5} = 2.91 \text{ \AA}$ , which corresponds with the first structure of the IRC. ELF of **S<sub>0-II</sub>** is similar to that of the nitrene **20** (see Table 1), showing the presence of monosynaptic basins,  $V(O1)$  and  $V'(O1)$  associated with the non bonding electron density on the O1 oxygen and the disynaptic basins,  $V(N2,C3)$ ,  $V(N2,O1)$  and  $V(C4,C5)$ ;  $V'(C4,C5)$ , respectively associated with the N2-C3, N2-O1 and C4-C5 bonding regions.

*Phase II* starts at **S<sub>1-II</sub>**,  $d_{C3-C4} = 2.27 \text{ \AA}$  and  $d_{O1-C5} = 2.19 \text{ \AA}$  and is associated with the creation of the monosynaptic  $V(N2)$  basin integrating 0.82 e associated with the non bonding electron density at N2 nitrogen. Note that the disynaptic  $V(N2,C3)$  experiences depopulation of 0.58 e from 3.77 e at **S<sub>0-II</sub>** to 3.19 e at **S<sub>1-II</sub>**, while the  $V(N2,O1)$  disynaptic basin is depopulated by 0.13 e from 1.48 e at **S<sub>0-II</sub>** to 1.35 e at **S<sub>1-II</sub>**, suggesting that the non-bonding electron density at N2 is created by deriving the electron density mainly from the N2-C3 bonding region. In this phase, the disynaptic  $V(C4,C5)$  and  $V'(C4,C5)$  basins present at **S<sub>1-II</sub>** are merged into one disynaptic basins  $V(C4,C5)$  integrating at 3.38 e, suggesting the rupture of the C4-C5 double bond. These electronic changes demand the energy cost (EC) of 17.9 kcal mol<sup>-1</sup>.

*Phase III* starts at **S<sub>2-II</sub>**,  $d_{C3-C4} = 2.20 \text{ \AA}$  and  $d_{O1-C5} = 2.14 \text{ \AA}$ , which is characterized by the creation of a new  $V(C3)$  monosynaptic basin, integrating 0.30 e, associated with the formation of the *pseudoradical* centre at C3 carbon. The electron density for the creation of the *pseudoradical* centre mainly comes from the depopulation of the N2-C3 bonding region integrating 3.19 e at **S<sub>1-II</sub>** to 2.72 e at **S<sub>2-II</sub>**.

*Phase IV* starts at **S<sub>3-II</sub>**,  $d_{C3-C4} = 2.14 \text{ \AA}$  and  $d_{O1-C5} = 2.10 \text{ \AA}$ , which is characterized by the creation of a new  $V(C4)$  monosynaptic basin, integrating 0.34 e, associated with the formation of a *pseudoradical* center at the C4 carbon which derives electron density from the C4-C5 bonding region. The  $V(C4,C5)$  disynaptic basin experiences a depopulation of 0.36 e from 3.35 e at **S<sub>2-II</sub>** to 2.99 e at **S<sub>3-II</sub>**. In this phase, the **TS5** is found and the bonding changes along the phase demand the EC of 20.2 kcal mol<sup>-1</sup>. The GEDT value of 0.03 e indicates non-polar character of this 32CA reaction.

**Table S2.** ELF valence basin populations, distances of the forming bonds, and relative electronic energies of the IRC structures **S<sub>0-II</sub>** – **S<sub>5-II</sub>** defining the six phases characterizing the molecular mechanism of the intramolecular 32CA reaction of **20**. Distances are given in angstroms, Å, and relative energies in kcal·mol<sup>-1</sup>.

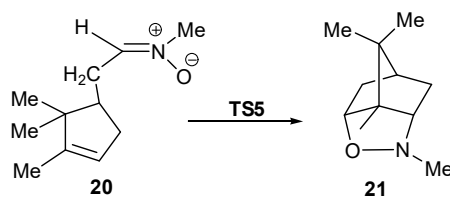

| Phases     | <i>I</i>                | <i>II</i>               | <i>III</i>              | <i>IV</i>               | <i>V</i>                | <i>VI</i>               |           |
|------------|-------------------------|-------------------------|-------------------------|-------------------------|-------------------------|-------------------------|-----------|
| Structures | <b>S<sub>0-II</sub></b> | <b>S<sub>1-II</sub></b> | <b>S<sub>2-II</sub></b> | <b>S<sub>3-II</sub></b> | <b>S<sub>4-II</sub></b> | <b>S<sub>5-II</sub></b> | <b>21</b> |
| d(C3-C4)   | 3.000                   | 2.266                   | 2.202                   | 2.140                   | 1.947                   | 1.748                   | 1.542     |
| d(O1-C5)   | 2.905                   | 2.190                   | 2.143                   | 2.096                   | 1.944                   | 1.751                   | 1.397     |
| ΔE         | 0.0                     | 17.9                    | 19.4                    | 20.2                    | 16.8                    | 1.56                    | -24.9     |
| GEDT       | 0.015                   | 0.002                   | 0.013                   | 0.031                   | 0.116                   | 0.216                   | 0.295     |
| V(O1)      | 2.89                    | 2.88                    | 2.89                    | 2.89                    | 2.87                    | 2.75                    | 2.53      |
| V'(O1)     | 3.04                    | 2.98                    | 2.97                    | 2.95                    | 2.95                    | 2.70                    | 2.56      |
| V(N2,C3)   | 3.77                    | 3.19                    | 2.72                    | 2.53                    | 2.20                    | 2.00                    | 1.85      |
| V'(N2,O1)  | 1.48                    | 1.35                    | 1.31                    | 1.28                    | 1.18                    | 1.08                    | 0.96      |
| V(C4,C5)   | 1.74                    | 3.38                    | 3.35                    | 2.99                    | 2.53                    | 2.18                    | 1.95      |
| V'(C4,C5)  | 1.77                    |                         |                         |                         |                         |                         |           |
| V(N2)      |                         | 0.82                    | 1.10                    | 1.31                    | 1.79                    | 2.11                    | 2.34      |
| V(C3)      |                         |                         | 0.30                    | 0.39                    |                         |                         |           |
| V(C4)      |                         |                         |                         | 0.34                    |                         |                         |           |
| V(C5)      |                         |                         |                         |                         | 0.10                    |                         |           |
| V(C3,C4)   |                         |                         |                         |                         | 1.30                    | 1.65                    | 1.91      |
| V(O1,C5)   |                         |                         |                         |                         |                         | 0.63                    | 1.33      |

*Phase V* starts at **S<sub>4-II</sub>**,  $d_{C3-C4} = 1.95$  Å and  $d_{O1-C5} = 1.94$  Å. At the beginning of this phase, the first relevant change along the IRC takes place. At this structure, while the V(C3) and V(C4) monosynaptic basins present at **S<sub>3-II</sub>** are missing, a new V(C3,C4) disynaptic basin, integrating 1.30 e, is created. This topological change indicates that the formation of the first C3-C4 single bond has begun at a C–C distance of 1.95 Å. This phase is also characterized by the creation of a new V(C5) monosynaptic basin, integrating 0.10 e, associated with the formation of a *pseudoradical* center at the C5 carbon deriving electron density from the C4-C5 bonding region. The V(C4,C5) disynaptic basin experiences a depopulation of 0.46 e from **S<sub>3-II</sub>** to **S<sub>4-II</sub>**.

*Phase VI* starts at **S<sub>5-II</sub>**,  $d_{C3-C4} = 1.75$  Å and  $d_{O1-C5} = 1.75$  Å. At the beginning of this phase the second relevant change along the IRC takes place. At this structure, while the

V(C5) monosynaptic basins present at **S<sub>4</sub>-II** is missing, a new V(O1,C5) disynaptic basin, integrating 0.63 e, is created. This topological change indicates that the formation of the second O1-C5 single bond has begun at a C–C distance of 1.75 Å. Note that the formation of the second O1-C5 bond starts, when the first C3-C4 bond has been formed by 86%, suggesting a highly asynchronous C-C and C-O bond formation, which is not depicted from the geometrical parameters at the early TSs. The molecular geometry is finally relaxed in the isoxazolidine **21**, with the V(C3,C4) and V(O1,C5) integrating the electron density of 1.91 e and 1.33 e respectively.

## References

1. X. Krokidis, S. Noury and B. Silvi, *J. Phys. Chem. A*, 1997, **101**, 7277-7282.
2. A. D. Becke and K. E. Edgecombe, *J. Chem. Phys.*, 1990, **92**, 5397-5403.
3. B. Silvi and A. Savin, *Nature*, 1994, **371**, 683- 686.
4. (a) Thom, R. *Stabilité Structurelle et Morphogénèse*; Interditions, Paris, 1972; (b) A. E. R. Woodcock, T. A. Poston in *Geometrical Study of Elementary Catastrophes*, Springer-Verlag, Berlin, 1974.\
5. (a) V. Polo, J. Andrés, S. Berski, L. R. Domingo and B. Silvi, *J. Phys. Chem. A.*, 2008, **112** 7128-7136; (b) J. Andrés, P. González-Navarrete and V. Safont, *Int. J. Quantum Chem.*, 2014, **114**, 1239-1252; (c) J. Andrés, S. Berski, L.R. Domingo, V. Polo and B. Silvi. *Curr. Org. Chem.*, 2011, **15**, 3566-3575.

Table with the MPWB1K/6-311G(d,p) calculated electronic energies (au), computed at 298 K in gas phase and toluene of the stationary points involved in the IM32CA reactions of nitrones **15**, **18**, **20**, **24** and **26**.

|            | E(Gas Phase) | E(Toluene)  |
|------------|--------------|-------------|
| <b>15</b>  | -556.720262  | -556.726939 |
| <b>18</b>  | -635.327011  | -635.333512 |
| <b>20</b>  | -560.33485   | -560.340302 |
| <b>24</b>  | -481.73552   | -481.741909 |
| <b>26</b>  | -560.334207  | -560.339869 |
| <b>TS1</b> | -556.678448  | -556.684362 |
| <b>TS2</b> | -556.672609  | -556.678224 |
| <b>TS3</b> | -635.278289  | -635.284086 |
| <b>TS4</b> | -635.279192  | -635.284155 |
| <b>TS5</b> | -560.302515  | -560.305957 |
| <b>TS6</b> | -560.303557  | -560.306490 |
| <b>TS7</b> | -481.705566  | -481.709178 |
| <b>TS8</b> | -560.303804  | -560.307202 |
| <b>16</b>  | -556.759889  | -556.76548  |
| <b>17</b>  | -556.754954  | -556.760572 |
| <b>35</b>  | -635.359606  | -635.364798 |
| <b>36</b>  | -635.357858  | -635.362965 |
| <b>21</b>  | -560.373376  | -560.376388 |
| <b>22</b>  | -560.372062  | -560.374669 |
| <b>25</b>  | -481.776448  | -481.779387 |
| <b>27</b>  | -560.369780  | -560.372710 |



Table with the MPWB1K/6-311G(d,p) calculated enthalpies (au), entropies (Cal mol<sup>-1</sup>K<sup>-1</sup>) and Gibbs free energies (au), computed at 298 K in toluene of the stationary points involved in the IM32CA reactions of nitrones **15**, **18**, **20**, **24** and **26**.

|            | H           | S       | G           |
|------------|-------------|---------|-------------|
| <b>15</b>  | -556.491914 | 111.574 | -556.544926 |
| <b>18</b>  | -635.038255 | 127.871 | -635.099011 |
| <b>20</b>  | -560.035255 | 116.542 | -560.090628 |
| <b>24</b>  | -481.495638 | 103.929 | -481.545018 |
| <b>26</b>  | -560.033486 | 112.406 | -560.086894 |
| <b>TS1</b> | -556.450807 | 100.453 | -556.498536 |
| <b>TS2</b> | -556.444705 | 100.227 | -556.492326 |
| <b>TS3</b> | -634.990267 | 110.718 | -635.042872 |
| <b>TS4</b> | -634.990473 | 110.207 | -635.042836 |
| <b>TS5</b> | -560.001779 | 104.637 | -560.051496 |
| <b>TS6</b> | -560.002763 | 104.589 | -560.052457 |
| <b>TS7</b> | -481.463925 | 91.925  | -481.507602 |
| <b>TS8</b> | -560.001817 | 102.752 | -560.050638 |
| <b>16</b>  | -556.527866 | 100.535 | -556.575633 |
| <b>17</b>  | -556.523201 | 97.298  | -556.569431 |
| <b>35</b>  | -635.067666 | 108.470 | -635.119203 |
| <b>36</b>  | -635.066176 | 107.677 | -635.117337 |
| <b>21</b>  | -560.069608 | 104.203 | -560.119118 |
| <b>22</b>  | -560.067733 | 101.915 | -560.116156 |
| <b>25</b>  | -481.530388 | 88.255  | -481.572321 |
| <b>27</b>  | -560.064008 | 101.150 | -560.112068 |

MPWB1K/6-311G(d,p) gas phase computed unique imaginary frequency, and Cartesian coordinates of the stationary points involved in the IM32CA reactions of nitrones **15**, **18**, **20**, **24** and **26** in gas phase

Nitron 15 (Gas Phase)

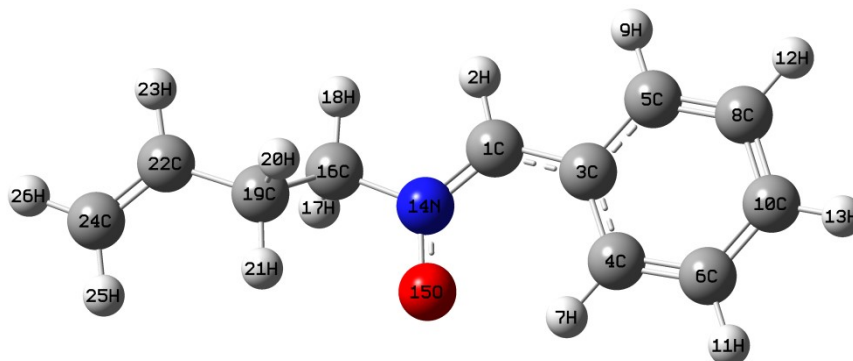

| Center Number | Atomic Number | Atomic Type | Coordinates (Angstroms) |           |           |
|---------------|---------------|-------------|-------------------------|-----------|-----------|
|               |               |             | X                       | Y         | Z         |
| 1             | 6             | 0           | 0.270102                | -0.710307 | 0.253297  |
| 2             | 1             | 0           | 0.044827                | -1.760729 | 0.292608  |
| 3             | 6             | 0           | 1.643015                | -0.307456 | 0.082631  |
| 4             | 6             | 0           | 2.070319                | 1.017443  | -0.001903 |
| 5             | 6             | 0           | 2.594038                | -1.324863 | -0.003091 |
| 6             | 6             | 0           | 3.411413                | 1.296258  | -0.167595 |
| 7             | 1             | 0           | 1.342523                | 1.803636  | 0.063711  |
| 8             | 6             | 0           | 3.928415                | -1.035409 | -0.166771 |
| 9             | 1             | 0           | 2.273591                | -2.353497 | 0.061434  |
| 10            | 6             | 0           | 4.343108                | 0.281264  | -0.250087 |
| 11            | 1             | 0           | 3.730508                | 2.323735  | -0.232575 |
| 12            | 1             | 0           | 4.647059                | -1.836052 | -0.229501 |
| 13            | 1             | 0           | 5.387981                | 0.511869  | -0.378753 |
| 14            | 7             | 0           | -0.750035               | 0.081102  | 0.375952  |
| 15            | 8             | 0           | -0.716329               | 1.333334  | 0.365072  |
| 16            | 6             | 0           | -2.091929               | -0.485610 | 0.543011  |
| 17            | 1             | 0           | -2.443070               | -0.144150 | 1.511409  |
| 18            | 1             | 0           | -2.023732               | -1.568052 | 0.547407  |
| 19            | 6             | 0           | -3.008381               | 0.021353  | -0.551720 |
| 20            | 1             | 0           | -2.609428               | -0.300001 | -1.513731 |
| 21            | 1             | 0           | -2.983725               | 1.105174  | -0.532230 |
| 22            | 6             | 0           | -4.397669               | -0.483936 | -0.377679 |
| 23            | 1             | 0           | -4.538995               | -1.554548 | -0.457449 |
| 24            | 6             | 0           | -5.441648               | 0.283257  | -0.131162 |
| 25            | 1             | 0           | -5.341109               | 1.354863  | -0.047481 |
| 26            | 1             | 0           | -6.430255               | -0.128603 | -0.010685 |

## Nitron 18 (Gas Phase)

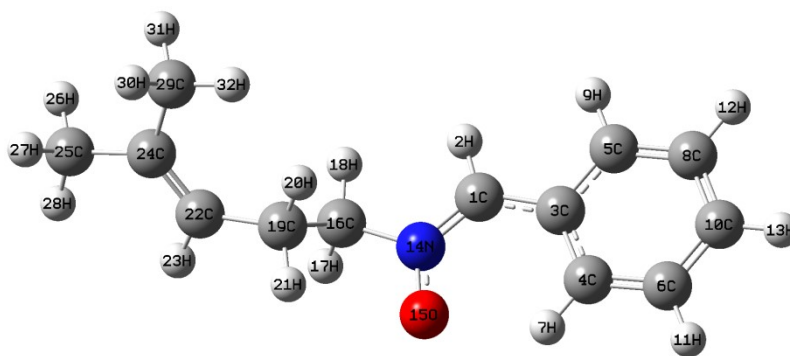

| Center Number | Atomic Number | Atomic Type | Coordinates (Angstroms) |           |           |
|---------------|---------------|-------------|-------------------------|-----------|-----------|
|               |               |             | X                       | Y         | Z         |
| 1             | 6             | 0           | 1.063511                | 0.274029  | -0.579276 |
| 2             | 1             | 0           | 0.682159                | 1.168599  | -1.037417 |
| 3             | 6             | 0           | 2.458490                | 0.230845  | -0.222529 |
| 4             | 6             | 0           | 3.091599                | -0.858737 | 0.374035  |
| 5             | 6             | 0           | 3.211117                | 1.371726  | -0.501884 |
| 6             | 6             | 0           | 4.436661                | -0.789771 | 0.675338  |
| 7             | 1             | 0           | 2.517971                | -1.739105 | 0.590770  |
| 8             | 6             | 0           | 4.550723                | 1.430309  | -0.197224 |
| 9             | 1             | 0           | 2.730150                | 2.220142  | -0.964181 |
| 10            | 6             | 0           | 5.170501                | 0.345143  | 0.395148  |
| 11            | 1             | 0           | 4.915835                | -1.638098 | 1.136429  |
| 12            | 1             | 0           | 5.113682                | 2.321640  | -0.420860 |
| 13            | 1             | 0           | 6.220202                | 0.386129  | 0.635898  |
| 14            | 7             | 0           | 0.194337                | -0.673375 | -0.409271 |
| 15            | 8             | 0           | 0.416291                | -1.795695 | 0.100145  |
| 16            | 6             | 0           | -1.195105               | -0.458012 | -0.828510 |
| 17            | 1             | 0           | -1.397889               | -1.217265 | -1.577729 |
| 18            | 1             | 0           | -1.285655               | 0.522944  | -1.280554 |
| 19            | 6             | 0           | -2.131960               | -0.618497 | 0.351296  |
| 20            | 1             | 0           | -1.920337               | 0.154292  | 1.083747  |
| 21            | 1             | 0           | -1.894485               | -1.572866 | 0.814076  |
| 22            | 6             | 0           | -3.552341               | -0.595651 | -0.091555 |
| 23            | 1             | 0           | -3.846380               | -1.429685 | -0.717167 |
| 24            | 6             | 0           | -4.481490               | 0.310726  | 0.184443  |
| 25            | 6             | 0           | -5.870603               | 0.161676  | -0.342338 |
| 26            | 1             | 0           | -6.148124               | 1.020530  | -0.951761 |
| 27            | 1             | 0           | -6.589838               | 0.112837  | 0.473986  |
| 28            | 1             | 0           | -5.977824               | -0.734257 | -0.944282 |
| 29            | 6             | 0           | -4.268719               | 1.522520  | 1.028345  |
| 30            | 1             | 0           | -4.895712               | 1.478224  | 1.917633  |
| 31            | 1             | 0           | -4.566097               | 2.417166  | 0.483949  |
| 32            | 1             | 0           | -3.242653               | 1.650115  | 1.349463  |

## Nitron 20 (Gas Phase)

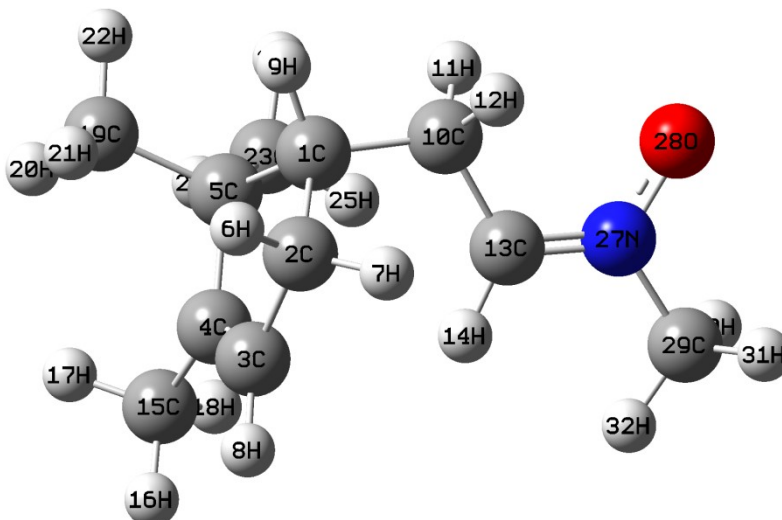

| Center Number | Atomic Number | Atomic Type | Coordinates (Angstroms) |           |           |
|---------------|---------------|-------------|-------------------------|-----------|-----------|
|               |               |             | X                       | Y         | Z         |
| 1             | 6             | 0           | 0.635669                | -1.193215 | 0.537414  |
| 2             | 6             | 0           | 0.875837                | -0.498572 | 1.884852  |
| 3             | 6             | 0           | 1.370920                | 0.854905  | 1.496283  |
| 4             | 6             | 0           | 1.701096                | 0.921703  | 0.216079  |
| 5             | 6             | 0           | 1.534197                | -0.421796 | -0.459811 |
| 6             | 1             | 0           | 1.617170                | -1.023357 | 2.488685  |
| 7             | 1             | 0           | -0.034406               | -0.459952 | 2.483532  |
| 8             | 1             | 0           | 1.476858                | 1.668242  | 2.197839  |
| 9             | 1             | 0           | 0.965361                | -2.228898 | 0.577065  |
| 10            | 6             | 0           | -0.842609               | -1.226201 | 0.187313  |
| 11            | 1             | 0           | -1.015526               | -1.679009 | -0.789583 |
| 12            | 1             | 0           | -1.366214               | -1.887039 | 0.881425  |
| 13            | 6             | 0           | -1.527663               | 0.081746  | 0.211994  |
| 14            | 1             | 0           | -1.045360               | 1.003606  | 0.479027  |
| 15            | 6             | 0           | 2.249908                | 2.095090  | -0.507311 |
| 16            | 1             | 0           | 2.387689                | 2.941772  | 0.156697  |
| 17            | 1             | 0           | 3.211135                | 1.861427  | -0.962634 |
| 18            | 1             | 0           | 1.587966                | 2.399423  | -1.316375 |
| 19            | 6             | 0           | 2.900430                | -1.099694 | -0.522449 |
| 20            | 1             | 0           | 3.611775                | -0.506616 | -1.092732 |
| 21            | 1             | 0           | 3.304139                | -1.240554 | 0.477344  |
| 22            | 1             | 0           | 2.821013                | -2.073672 | -1.000872 |
| 23            | 6             | 0           | 0.972004                | -0.315828 | -1.865727 |
| 24            | 1             | 0           | 0.802074                | -1.302174 | -2.290460 |
| 25            | 1             | 0           | 0.030218                | 0.226232  | -1.890816 |
| 26            | 1             | 0           | 1.675041                | 0.201960  | -2.514316 |
| 27            | 7             | 0           | -2.778647               | 0.118166  | -0.099391 |
| 28            | 8             | 0           | -3.448490               | -0.891995 | -0.424390 |
| 29            | 6             | 0           | -3.514308               | 1.373446  | -0.094285 |
| 30            | 1             | 0           | -3.909870               | 1.519716  | -1.091430 |
| 31            | 1             | 0           | -4.339200               | 1.261099  | 0.597799  |
| 32            | 1             | 0           | -2.874292               | 2.197088  | 0.194553  |

## Nitron 24 (Gas Phase)

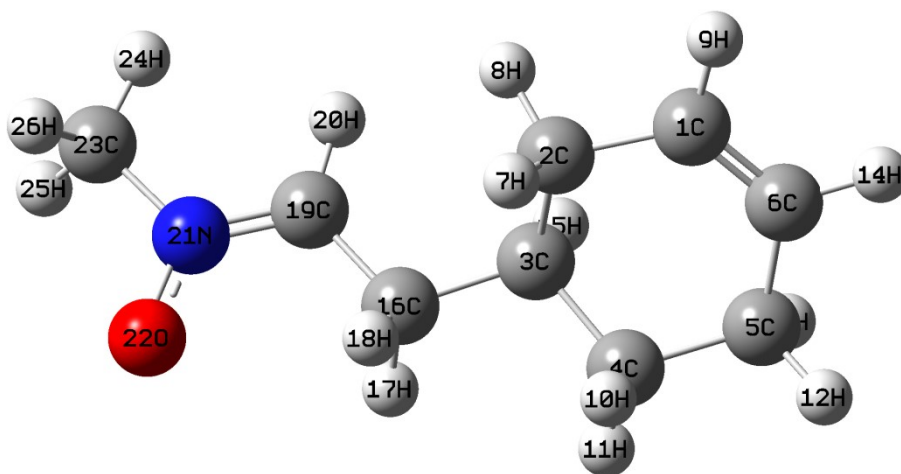

| Center Number | Atomic Number | Atomic Type | Coordinates (Angstroms) |           |           |
|---------------|---------------|-------------|-------------------------|-----------|-----------|
|               |               |             | X                       | Y         | Z         |
| 1             | 6             | 0           | 2.609429                | 1.404422  | 0.339984  |
| 2             | 6             | 0           | 1.160074                | 1.073149  | 0.468740  |
| 3             | 6             | 0           | 0.798730                | -0.212945 | -0.255711 |
| 4             | 6             | 0           | 1.830602                | -1.275779 | 0.070944  |
| 5             | 6             | 0           | 3.204017                | -0.874445 | -0.426182 |
| 6             | 6             | 0           | 3.518939                | 0.541817  | -0.080152 |
| 7             | 1             | 0           | 0.893564                | 0.979151  | 1.524708  |
| 8             | 1             | 0           | 0.564815                | 1.904545  | 0.091578  |
| 9             | 1             | 0           | 2.912351                | 2.408231  | 0.600345  |
| 10            | 1             | 0           | 1.861128                | -1.408124 | 1.153159  |
| 11            | 1             | 0           | 1.536451                | -2.231822 | -0.356560 |
| 12            | 1             | 0           | 3.964049                | -1.530482 | -0.005282 |
| 13            | 1             | 0           | 3.266924                | -1.007485 | -1.508064 |
| 14            | 1             | 0           | 4.546695                | 0.861157  | -0.174723 |
| 15            | 1             | 0           | 0.853206                | -0.019437 | -1.330453 |
| 16            | 6             | 0           | -0.600708               | -0.681345 | 0.084700  |
| 17            | 1             | 0           | -0.798672               | -1.662234 | -0.353456 |
| 18            | 1             | 0           | -0.707831               | -0.839496 | 1.160366  |
| 19            | 6             | 0           | -1.664405               | 0.242276  | -0.352458 |
| 20            | 1             | 0           | -1.485711               | 1.114092  | -0.955781 |
| 21            | 7             | 0           | -2.882986               | -0.014444 | -0.019256 |
| 22            | 8             | 0           | -3.223143               | -1.006224 | 0.668496  |
| 23            | 6             | 0           | -3.973404               | 0.855992  | -0.433113 |
| 24            | 1             | 0           | -3.606074               | 1.689037  | -1.018350 |
| 25            | 1             | 0           | -4.666318               | 0.253910  | -1.006928 |
| 26            | 1             | 0           | -4.468179               | 1.201009  | 0.465764  |

## Nitron 26 (Gas Phase)

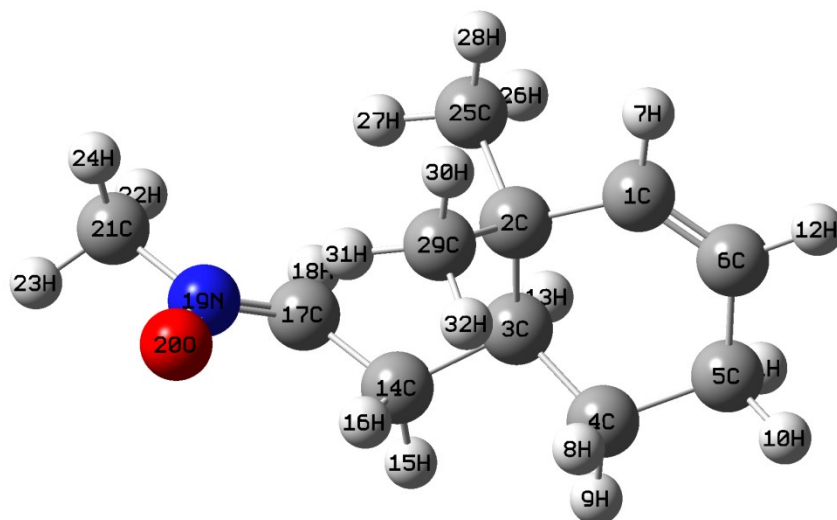

Standard orientation:

| Center Number | Atomic Number | Atomic Type | Coordinates (Angstroms) |           |           |
|---------------|---------------|-------------|-------------------------|-----------|-----------|
|               |               |             | X                       | Y         | Z         |
| 1             | 6             | 0           | 2.336891                | 1.210016  | 0.089305  |
| 2             | 6             | 0           | 0.884989                | 0.821860  | 0.057860  |
| 3             | 6             | 0           | 0.746047                | -0.639876 | -0.409812 |
| 4             | 6             | 0           | 1.839131                | -1.509522 | 0.190888  |
| 5             | 6             | 0           | 3.215574                | -1.070403 | -0.249864 |
| 6             | 6             | 0           | 3.367026                | 0.400453  | -0.078179 |
| 7             | 1             | 0           | 2.519172                | 2.266500  | 0.240708  |
| 8             | 1             | 0           | 1.774549                | -1.452214 | 1.277638  |
| 9             | 1             | 0           | 1.667240                | -2.549917 | -0.077926 |
| 10            | 1             | 0           | 3.980709                | -1.590192 | 0.324041  |
| 11            | 1             | 0           | 3.387140                | -1.345184 | -1.292699 |
| 12            | 1             | 0           | 4.366800                | 0.809872  | -0.075397 |
| 13            | 1             | 0           | 0.884892                | -0.641795 | -1.494580 |
| 14            | 6             | 0           | -0.601490               | -1.287787 | -0.089390 |
| 15            | 1             | 0           | -0.552983               | -2.320815 | -0.438964 |
| 16            | 1             | 0           | -0.761914               | -1.324110 | 0.984172  |
| 17            | 6             | 0           | -1.788249               | -0.657519 | -0.696575 |
| 18            | 1             | 0           | -1.876271               | -0.518345 | -1.759767 |
| 19            | 7             | 0           | -2.788995               | -0.268657 | 0.019419  |
| 20            | 8             | 0           | -2.867474               | -0.348238 | 1.271753  |
| 21            | 6             | 0           | -3.951072               | 0.337338  | -0.615543 |
| 22            | 1             | 0           | -3.840725               | 0.363585  | -1.691910 |
| 23            | 1             | 0           | -4.814459               | -0.248254 | -0.327248 |
| 24            | 1             | 0           | -4.053210               | 1.336336  | -0.210385 |
| 25            | 6             | 0           | 0.208263                | 1.778467  | -0.920069 |
| 26            | 1             | 0           | 0.588896                | 1.638974  | -1.929277 |
| 27            | 1             | 0           | -0.868404               | 1.643547  | -0.931243 |
| 28            | 1             | 0           | 0.403564                | 2.808498  | -0.629302 |
| 29            | 6             | 0           | 0.283939                | 1.034384  | 1.442468  |
| 30            | 1             | 0           | 0.486546                | 2.047248  | 1.782933  |
| 31            | 1             | 0           | -0.793791               | 0.884788  | 1.442561  |
| 32            | 1             | 0           | 0.718711                | 0.353518  | 2.170154  |

Isoxazolidine **16** (Gas Phase)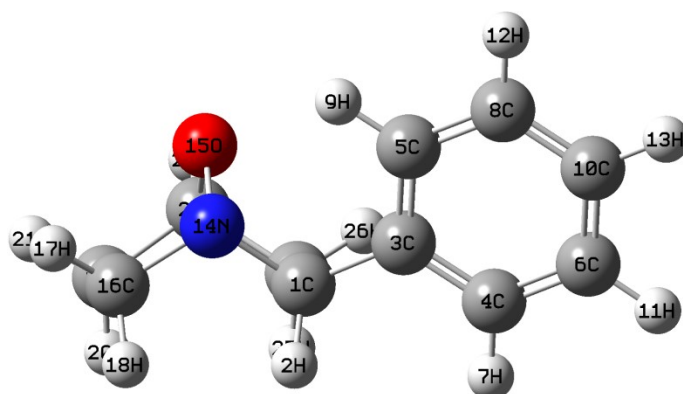

| Center Number | Atomic Number | Atomic Type | Coordinates (Angstroms) |           |           |
|---------------|---------------|-------------|-------------------------|-----------|-----------|
|               |               |             | X                       | Y         | Z         |
| 1             | 6             | 0           | 0.474749                | 0.501652  | 0.453877  |
| 2             | 1             | 0           | 0.587755                | 1.120100  | 1.339952  |
| 3             | 6             | 0           | -0.982858               | 0.200126  | 0.260906  |
| 4             | 6             | 0           | -1.899300               | 1.237195  | 0.323898  |
| 5             | 6             | 0           | -1.433635               | -1.079512 | -0.007206 |
| 6             | 6             | 0           | -3.244023               | 1.003625  | 0.121772  |
| 7             | 1             | 0           | -1.556886               | 2.239098  | 0.537587  |
| 8             | 6             | 0           | -2.780208               | -1.313259 | -0.209506 |
| 9             | 1             | 0           | -0.721997               | -1.885903 | -0.052435 |
| 10            | 6             | 0           | -3.688970               | -0.276272 | -0.147048 |
| 11            | 1             | 0           | -3.945595               | 1.820129  | 0.179114  |
| 12            | 1             | 0           | -3.120644               | -2.315049 | -0.416586 |
| 13            | 1             | 0           | -4.738699               | -0.463454 | -0.304153 |
| 14            | 7             | 0           | 1.270404                | -0.715320 | 0.647268  |
| 15            | 8             | 0           | 1.595721                | -1.056547 | -0.683992 |
| 16            | 6             | 0           | 2.588512                | -0.354409 | 1.170247  |
| 17            | 1             | 0           | 3.085883                | -1.265141 | 1.480533  |
| 18            | 1             | 0           | 2.475043                | 0.288336  | 2.036088  |
| 19            | 6             | 0           | 3.308134                | 0.307052  | -0.017900 |
| 20            | 1             | 0           | 3.580912                | 1.341558  | 0.160886  |
| 21            | 1             | 0           | 4.199130                | -0.243492 | -0.297900 |
| 22            | 6             | 0           | 2.216538                | 0.164922  | -1.063806 |
| 23            | 1             | 0           | 2.546939                | 0.091321  | -2.090793 |
| 24            | 6             | 0           | 1.116456                | 1.167920  | -0.789926 |
| 25            | 1             | 0           | 1.489756                | 2.167432  | -0.594229 |
| 26            | 1             | 0           | 0.407446                | 1.210437  | -1.608853 |

## Isoxazolidine 17 (Gas Phase)

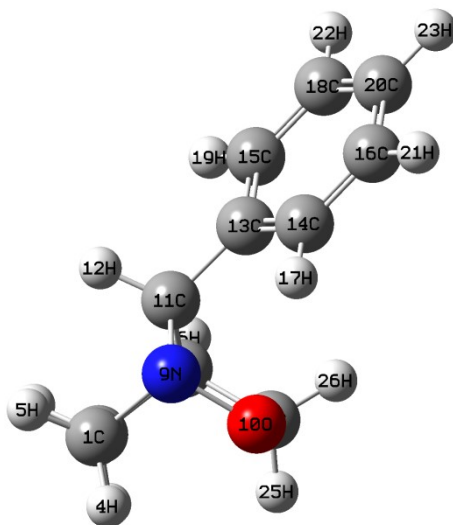

| Center Number | Atomic Number | Atomic Type | Coordinates (Angstroms) |           |           |
|---------------|---------------|-------------|-------------------------|-----------|-----------|
|               |               |             | X                       | Y         | Z         |
| 1             | 6             | 0           | 2.759398                | -0.381786 | -0.873398 |
| 2             | 6             | 0           | 1.445858                | 1.011527  | 0.504872  |
| 3             | 6             | 0           | 2.840969                | 0.952953  | -0.099105 |
| 4             | 1             | 0           | 3.446059                | -1.137573 | -0.515968 |
| 5             | 1             | 0           | 2.910670                | -0.253548 | -1.940916 |
| 6             | 1             | 0           | 1.118357                | 1.978914  | 0.862846  |
| 7             | 1             | 0           | 3.617527                | 0.954386  | 0.659164  |
| 8             | 1             | 0           | 3.020229                | 1.792298  | -0.764994 |
| 9             | 7             | 0           | 1.398823                | -0.872114 | -0.659651 |
| 10            | 8             | 0           | 1.374794                | -1.279175 | 0.704064  |
| 11            | 6             | 0           | 0.628539                | 0.364221  | -0.618243 |
| 12            | 1             | 0           | 0.779970                | 0.883568  | -1.562852 |
| 13            | 6             | 0           | -0.831584               | 0.176473  | -0.356918 |
| 14            | 6             | 0           | -1.399734               | -1.082917 | -0.279113 |
| 15            | 6             | 0           | -1.637903               | 1.292352  | -0.199969 |
| 16            | 6             | 0           | -2.754315               | -1.218793 | -0.044936 |
| 17            | 1             | 0           | -0.768260               | -1.946586 | -0.397632 |
| 18            | 6             | 0           | -2.990850               | 1.155892  | 0.032673  |
| 19            | 1             | 0           | -1.202758               | 2.278416  | -0.265845 |
| 20            | 6             | 0           | -3.552829               | -0.103636 | 0.112039  |
| 21            | 1             | 0           | -3.187711               | -2.204003 | 0.015474  |
| 22            | 1             | 0           | -3.607141               | 2.032350  | 0.150438  |
| 23            | 1             | 0           | -4.609246               | -0.214581 | 0.294651  |
| 24            | 6             | 0           | 1.343641                | -0.102900 | 1.517026  |
| 25            | 1             | 0           | 2.178691                | -0.124589 | 2.212536  |
| 26            | 1             | 0           | 0.406361                | -0.081176 | 2.068584  |



Isoxazolidine **35** (Gas Phase)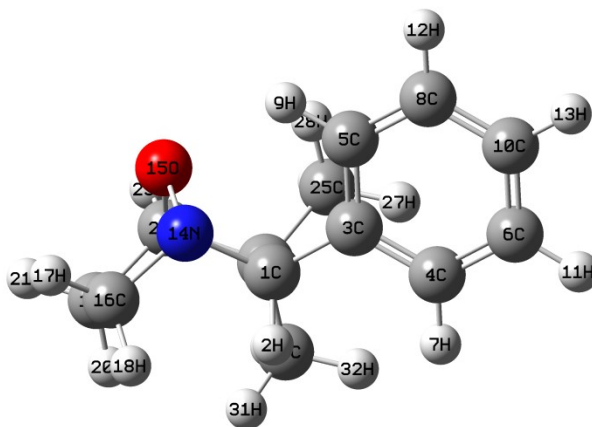

| Center Number | Atomic Number | Atomic Type | Coordinates (Angstroms) |           |           |
|---------------|---------------|-------------|-------------------------|-----------|-----------|
|               |               |             | X                       | Y         | Z         |
| 1             | 6             | 0           | -0.341458               | -0.015936 | -0.611427 |
| 2             | 1             | 0           | -0.501930               | 0.311833  | -1.636031 |
| 3             | 6             | 0           | 1.134497                | -0.122191 | -0.385727 |
| 4             | 6             | 0           | 1.979831                | 0.816358  | -0.953122 |
| 5             | 6             | 0           | 1.673588                | -1.117529 | 0.410739  |
| 6             | 6             | 0           | 3.340858                | 0.770106  | -0.724749 |
| 7             | 1             | 0           | 1.567706                | 1.588732  | -1.586287 |
| 8             | 6             | 0           | 3.034569                | -1.167165 | 0.635971  |
| 9             | 1             | 0           | 1.016135                | -1.853184 | 0.843596  |
| 10            | 6             | 0           | 3.872164                | -0.223788 | 0.073010  |
| 11            | 1             | 0           | 3.987019                | 1.505072  | -1.176925 |
| 12            | 1             | 0           | 3.444457                | -1.949306 | 1.254485  |
| 13            | 1             | 0           | 4.934487                | -0.266695 | 0.249763  |
| 14            | 7             | 0           | -1.024235               | -1.306722 | -0.438209 |
| 15            | 8             | 0           | -1.479085               | -1.220684 | 0.898732  |
| 16            | 6             | 0           | -2.297064               | -1.275570 | -1.157217 |
| 17            | 1             | 0           | -2.701969               | -2.280361 | -1.166280 |
| 18            | 1             | 0           | -2.131309               | -0.961755 | -2.181850 |
| 19            | 6             | 0           | -3.175043               | -0.318874 | -0.335327 |
| 20            | 1             | 0           | -3.502637               | 0.556311  | -0.883318 |
| 21            | 1             | 0           | -4.052483               | -0.823689 | 0.052951  |
| 22            | 6             | 0           | -2.204165               | -0.002752 | 0.785475  |
| 23            | 1             | 0           | -2.653567               | 0.234125  | 1.742108  |
| 24            | 6             | 0           | -1.090710               | 0.954621  | 0.362432  |
| 25            | 6             | 0           | -0.276558               | 1.306253  | 1.594724  |
| 26            | 1             | 0           | -0.860388               | 1.950590  | 2.248644  |
| 27            | 1             | 0           | 0.637355                | 1.829154  | 1.329047  |
| 28            | 1             | 0           | -0.001551               | 0.410718  | 2.142616  |
| 29            | 6             | 0           | -1.530999               | 2.225500  | -0.332860 |
| 30            | 1             | 0           | -2.177290               | 2.821595  | 0.307718  |
| 31            | 1             | 0           | -2.057880               | 2.031665  | -1.263086 |
| 32            | 1             | 0           | -0.660895               | 2.833512  | -0.571074 |

Isoxazolidine **36** (Gas Phase)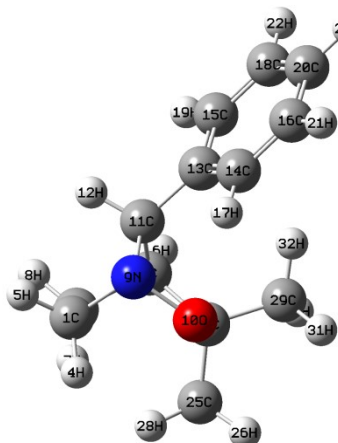

| Center Number | Atomic Number | Atomic Type | Coordinates (Angstroms) |           |           |
|---------------|---------------|-------------|-------------------------|-----------|-----------|
|               |               |             | X                       | Y         | Z         |
| 1             | 6             | 0           | -2.278343               | -1.554633 | -0.583478 |
| 2             | 6             | 0           | -1.255874               | -0.191250 | 1.031592  |
| 3             | 6             | 0           | -2.441649               | -1.134545 | 0.893702  |
| 4             | 1             | 0           | -3.041965               | -1.154049 | -1.238814 |
| 5             | 1             | 0           | -2.246060               | -2.631794 | -0.710905 |
| 6             | 1             | 0           | -0.989167               | 0.090184  | 2.043064  |
| 7             | 1             | 0           | -3.397784               | -0.675146 | 1.110919  |
| 8             | 1             | 0           | -2.326155               | -1.984326 | 1.561092  |
| 9             | 7             | 0           | -0.988467               | -1.001764 | -1.009131 |
| 10            | 8             | 0           | -1.198269               | 0.386321  | -1.197751 |
| 11            | 6             | 0           | -0.229645               | -1.013200 | 0.233629  |
| 12            | 1             | 0           | -0.221066               | -2.037131 | 0.606097  |
| 13            | 6             | 0           | 1.183546                | -0.544710 | 0.102524  |
| 14            | 6             | 0           | 1.725066                | -0.226941 | -1.130259 |
| 15            | 6             | 0           | 1.981239                | -0.462376 | 1.232413  |
| 16            | 6             | 0           | 3.040763                | 0.181523  | -1.225700 |
| 17            | 1             | 0           | 1.098199                | -0.291349 | -2.002947 |
| 18            | 6             | 0           | 3.295060                | -0.051694 | 1.136813  |
| 19            | 1             | 0           | 1.569143                | -0.717644 | 2.197310  |
| 20            | 6             | 0           | 3.828339                | 0.274561  | -0.095180 |
| 21            | 1             | 0           | 3.452267                | 0.431301  | -2.190276 |
| 22            | 1             | 0           | 3.904002                | 0.011435  | 2.024065  |
| 23            | 1             | 0           | 4.853955                | 0.596525  | -0.172986 |
| 24            | 6             | 0           | -1.461917               | 0.997226  | 0.088044  |
| 25            | 6             | 0           | -2.865520               | 1.568662  | 0.055933  |
| 26            | 1             | 0           | -2.884751               | 2.423473  | -0.613415 |
| 27            | 1             | 0           | -3.174768               | 1.905743  | 1.042391  |
| 28            | 1             | 0           | -3.586786               | 0.848874  | -0.313208 |
| 29            | 6             | 0           | -0.481414               | 2.129081  | 0.302605  |
| 30            | 1             | 0           | -0.765324               | 2.705986  | 1.179580  |
| 31            | 1             | 0           | -0.510894               | 2.788773  | -0.559965 |
| 32            | 1             | 0           | 0.534664                | 1.780704  | 0.428103  |

Isoxazolidine **21** (Gas Phase)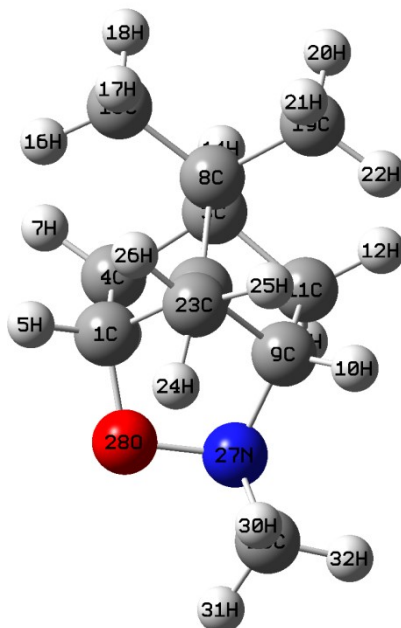

| Center Number | Atomic Number | Atomic Type | Coordinates (Angstroms) |           |           |
|---------------|---------------|-------------|-------------------------|-----------|-----------|
|               |               |             | X                       | Y         | Z         |
| 1             | 6             | 0           | -0.349410               | -0.409173 | -1.249044 |
| 2             | 6             | 0           | 0.151423                | 0.617546  | -0.239857 |
| 3             | 6             | 0           | 1.082636                | -1.303490 | 0.466259  |
| 4             | 6             | 0           | 0.338857                | -1.713317 | -0.804651 |
| 5             | 1             | 0           | -0.160327               | -0.153091 | -2.285997 |
| 6             | 1             | 0           | -0.410451               | -2.476526 | -0.618185 |
| 7             | 1             | 0           | 1.012751                | -2.086588 | -1.568935 |
| 8             | 6             | 0           | 1.553028                | 0.122276  | 0.131072  |
| 9             | 6             | 0           | -0.750694               | 0.133419  | 0.912632  |
| 10            | 1             | 0           | -0.979543               | 0.910154  | 1.636604  |
| 11            | 6             | 0           | 0.020047                | -1.046174 | 1.520569  |
| 12            | 1             | 0           | 0.456877                | -0.797451 | 2.482330  |
| 13            | 1             | 0           | -0.650035               | -1.887785 | 1.658178  |
| 14            | 1             | 0           | 1.865405                | -1.991599 | 0.770603  |
| 15            | 6             | 0           | 2.531147                | 0.182210  | -1.028846 |
| 16            | 1             | 0           | 2.148388                | -0.282109 | -1.931974 |
| 17            | 1             | 0           | 2.778356                | 1.213719  | -1.268641 |
| 18            | 1             | 0           | 3.459412                | -0.319723 | -0.765101 |
| 19            | 6             | 0           | 2.157122                | 0.880840  | 1.298654  |
| 20            | 1             | 0           | 3.040777                | 0.370000  | 1.675094  |
| 21            | 1             | 0           | 2.464935                | 1.873985  | 0.979263  |
| 22            | 1             | 0           | 1.465112                | 1.008266  | 2.124686  |
| 23            | 6             | 0           | -0.008718               | 2.054137  | -0.652621 |
| 24            | 1             | 0           | -1.016010               | 2.240167  | -1.013740 |
| 25            | 1             | 0           | 0.183554                | 2.728717  | 0.178467  |
| 26            | 1             | 0           | 0.680091                | 2.306036  | -1.456178 |
| 27            | 7             | 0           | -1.996800               | -0.332440 | 0.298194  |
| 28            | 8             | 0           | -1.738781               | -0.415405 | -1.105736 |
| 29            | 6             | 0           | -3.100638               | 0.580705  | 0.434264  |
| 30            | 1             | 0           | -2.872287               | 1.593476  | 0.093410  |
| 31            | 1             | 0           | -3.935539               | 0.198067  | -0.141267 |
| 32            | 1             | 0           | -3.392419               | 0.608735  | 1.479324  |

Isoxazolidine **22** (Gas Phase)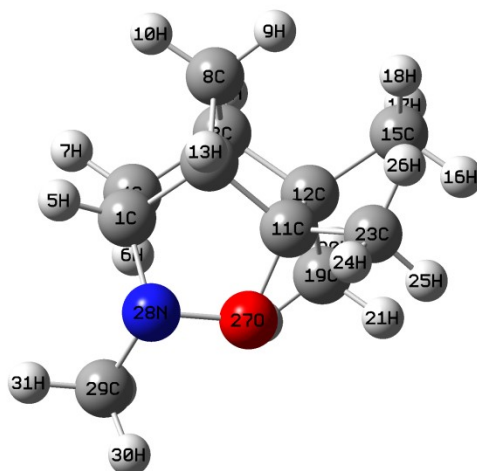

| Center Number | Atomic Number | Atomic Type | Coordinates (Angstroms) |           |           |
|---------------|---------------|-------------|-------------------------|-----------|-----------|
|               |               |             | X                       | Y         | Z         |
| 1             | 6             | 0           | 1.351903                | 0.878352  | -0.550555 |
| 2             | 6             | 0           | 0.113288                | 0.543465  | -1.363769 |
| 3             | 6             | 0           | -0.767021               | 1.413624  | 0.492849  |
| 4             | 6             | 0           | 0.740913                | 1.556553  | 0.698705  |
| 5             | 1             | 0           | 2.062310                | 1.513111  | -1.069928 |
| 6             | 1             | 0           | 1.093161                | 1.126172  | 1.628639  |
| 7             | 1             | 0           | 1.006769                | 2.610166  | 0.713427  |
| 8             | 6             | 0           | -0.857791               | 1.649679  | -1.009968 |
| 9             | 1             | 0           | -1.848200               | 1.523262  | -1.429758 |
| 10            | 1             | 0           | -0.484531               | 2.627131  | -1.306325 |
| 11            | 6             | 0           | -0.338514               | -0.685246 | -0.551171 |
| 12            | 6             | 0           | -1.186169               | -0.058843 | 0.605344  |
| 13            | 1             | 0           | 0.307469                | 0.338821  | -2.409437 |
| 14            | 1             | 0           | -1.357357               | 2.072175  | 1.123267  |
| 15            | 6             | 0           | -2.686385               | -0.201581 | 0.376730  |
| 16            | 1             | 0           | -2.987718               | -1.242435 | 0.458933  |
| 17            | 1             | 0           | -3.224320               | 0.356121  | 1.139919  |
| 18            | 1             | 0           | -3.019669               | 0.157990  | -0.590273 |
| 19            | 6             | 0           | -0.886051               | -0.687018 | 1.952945  |
| 20            | 1             | 0           | -1.482981               | -0.206247 | 2.725385  |
| 21            | 1             | 0           | -1.145162               | -1.743399 | 1.941704  |
| 22            | 1             | 0           | 0.159717                | -0.620960 | 2.223372  |
| 23            | 6             | 0           | -1.017038               | -1.767693 | -1.347456 |
| 24            | 1             | 0           | -0.316773               | -2.158920 | -2.078016 |
| 25            | 1             | 0           | -1.322585               | -2.584350 | -0.698656 |
| 26            | 1             | 0           | -1.895718               | -1.393168 | -1.863742 |
| 27            | 8             | 0           | 0.847458                | -1.245106 | -0.005526 |
| 28            | 7             | 0           | 1.946768                | -0.425038 | -0.392661 |
| 29            | 6             | 0           | 2.936561                | -0.572101 | 0.633764  |
| 30            | 1             | 0           | 3.289196                | -1.597363 | 0.632107  |
| 31            | 1             | 0           | 3.771373                | 0.079087  | 0.393786  |
| 32            | 1             | 0           | 2.565800                | -0.336230 | 1.633927  |

Isoxazolidine **25** (Gas Phase)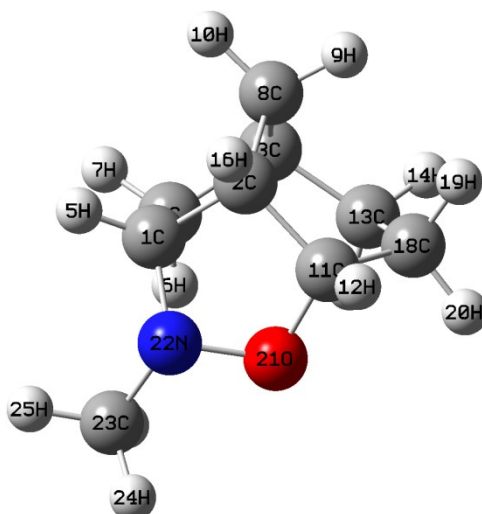

| Center Number | Atomic Number | Atomic Type | Coordinates (Angstroms) |           |           |
|---------------|---------------|-------------|-------------------------|-----------|-----------|
|               |               |             | X                       | Y         | Z         |
| 1             | 6             | 0           | 0.796226                | -0.907339 | 0.546553  |
| 2             | 6             | 0           | -0.329237               | -0.221348 | 1.307970  |
| 3             | 6             | 0           | -1.363961               | -0.986054 | -0.634926 |
| 4             | 6             | 0           | 0.102141                | -1.423387 | -0.729737 |
| 5             | 1             | 0           | 1.279230                | -1.698191 | 1.111253  |
| 6             | 1             | 0           | 0.573816                | -1.040734 | -1.629755 |
| 7             | 1             | 0           | 0.161968                | -2.508001 | -0.766851 |
| 8             | 6             | 0           | -1.581977               | -0.952415 | 0.870956  |
| 9             | 1             | 0           | -2.505005               | -0.461908 | 1.167740  |
| 10            | 1             | 0           | -1.593935               | -1.956913 | 1.289298  |
| 11            | 6             | 0           | -0.241049               | 1.198968  | 0.700147  |
| 12            | 1             | 0           | -0.112450               | 1.943333  | 1.484065  |
| 13            | 6             | 0           | -1.616597               | 0.411103  | -1.216876 |
| 14            | 1             | 0           | -2.629226               | 0.467718  | -1.609712 |
| 15            | 1             | 0           | -0.943787               | 0.576779  | -2.053876 |
| 16            | 1             | 0           | -0.164496               | -0.200796 | 2.378581  |
| 17            | 1             | 0           | -2.007587               | -1.703780 | -1.134934 |
| 18            | 6             | 0           | -1.420886               | 1.511232  | -0.182160 |
| 19            | 1             | 0           | -2.303535               | 1.608499  | 0.446946  |
| 20            | 1             | 0           | -1.273007               | 2.473098  | -0.665128 |
| 21            | 8             | 0           | 0.899660                | 1.197408  | -0.136482 |
| 22            | 7             | 0           | 1.736608                | 0.181501  | 0.390567  |
| 23            | 6             | 0           | 2.802333                | -0.000425 | -0.549366 |
| 24            | 1             | 0           | 3.407955                | 0.898729  | -0.565283 |
| 25            | 1             | 0           | 3.418015                | -0.825298 | -0.205096 |
| 26            | 1             | 0           | 2.456550                | -0.204316 | -1.564723 |

## Isoxazolidine 27 (Gas Phase)

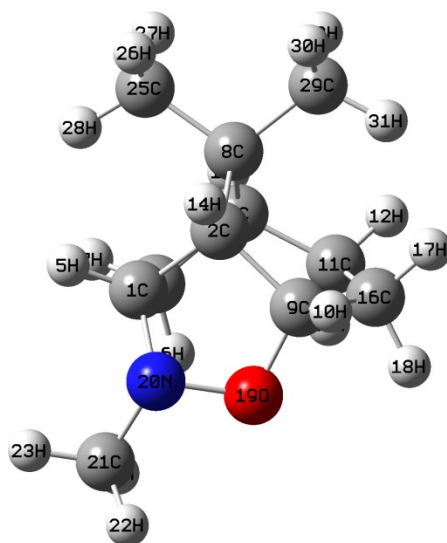

| Center<br>Number | Atomic<br>Number | Atomic<br>Type | Coordinates (Angstroms) |           |           |
|------------------|------------------|----------------|-------------------------|-----------|-----------|
|                  |                  |                | X                       | Y         | Z         |
| 1                | 6                | 0              | -0.834056               | -1.055932 | -0.175854 |
| 2                | 6                | 0              | 0.217660                | -0.312347 | -0.986126 |
| 3                | 6                | 0              | 0.966925                | -0.071687 | 1.191515  |
| 4                | 6                | 0              | -0.377638               | -0.812164 | 1.278237  |
| 5                | 1                | 0              | -0.918337               | -2.106890 | -0.429820 |
| 6                | 1                | 0              | -1.109655               | -0.215282 | 1.813192  |
| 7                | 1                | 0              | -0.271258               | -1.750310 | 1.814137  |
| 8                | 6                | 0              | 1.501100                | -0.496215 | -0.179455 |
| 9                | 6                | 0              | -0.393321               | 1.111236  | -0.942764 |
| 10               | 1                | 0              | -0.483975               | 1.510027  | -1.951586 |
| 11               | 6                | 0              | 0.808363                | 1.447899  | 1.264552  |
| 12               | 1                | 0              | 1.765199                | 1.891219  | 1.532739  |
| 13               | 1                | 0              | 0.126761                | 1.683254  | 2.077727  |
| 14               | 1                | 0              | 0.292191                | -0.670122 | -2.008226 |
| 15               | 1                | 0              | 1.632082                | -0.388041 | 1.993078  |
| 16               | 6                | 0              | 0.313219                | 2.088510  | -0.035856 |
| 17               | 1                | 0              | 1.128809                | 2.554291  | -0.579111 |
| 18               | 1                | 0              | -0.392086               | 2.886138  | 0.179883  |
| 19               | 8                | 0              | -1.690460               | 0.966147  | -0.387102 |
| 20               | 7                | 0              | -2.045076               | -0.388937 | -0.593808 |
| 21               | 6                | 0              | -3.221794               | -0.625478 | 0.189844  |
| 22               | 1                | 0              | -4.034825               | -0.036438 | -0.219269 |
| 23               | 1                | 0              | -3.478914               | -1.676262 | 0.102621  |
| 24               | 1                | 0              | -3.100354               | -0.366601 | 1.243779  |
| 25               | 6                | 0              | 1.888464                | -1.970654 | -0.168927 |
| 26               | 1                | 0              | 2.104531                | -2.315811 | -1.177957 |
| 27               | 1                | 0              | 2.784751                | -2.115227 | 0.430138  |
| 28               | 1                | 0              | 1.113846                | -2.609884 | 0.241557  |
| 29               | 6                | 0              | 2.719831                | 0.263068  | -0.670648 |
| 30               | 1                | 0              | 3.002138                | -0.085562 | -1.661805 |
| 31               | 1                | 0              | 2.582754                | 1.333844  | -0.725205 |
| 32               | 1                | 0              | 3.563027                | 0.073621  | -0.009504 |

## TS1 (Gas Phase)

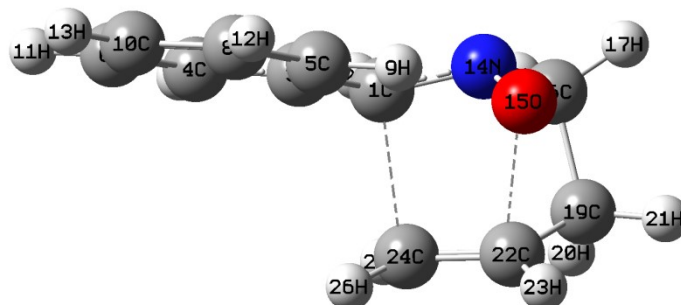

| Center Number | Atomic Number | Atomic Type | Coordinates (Angstroms) |           |           |
|---------------|---------------|-------------|-------------------------|-----------|-----------|
|               |               |             | X                       | Y         | Z         |
| 1             | 6             | 0           | 0.412572                | -0.601752 | -0.542981 |
| 2             | 1             | 0           | 0.544350                | -1.589294 | -0.959456 |
| 3             | 6             | 0           | -0.979496               | -0.237469 | -0.278282 |
| 4             | 6             | 0           | -1.910852               | -1.269765 | -0.275187 |
| 5             | 6             | 0           | -1.416298               | 1.061623  | -0.040805 |
| 6             | 6             | 0           | -3.244878               | -1.021213 | -0.036887 |
| 7             | 1             | 0           | -1.581421               | -2.279677 | -0.467073 |
| 8             | 6             | 0           | -2.755899               | 1.304822  | 0.181783  |
| 9             | 1             | 0           | -0.697518               | 1.860349  | -0.037136 |
| 10            | 6             | 0           | -3.673065               | 0.271850  | 0.191320  |
| 11            | 1             | 0           | -3.950915               | -1.835493 | -0.037992 |
| 12            | 1             | 0           | -3.085872               | 2.316180  | 0.355759  |
| 13            | 1             | 0           | -4.716012               | 0.473044  | 0.373788  |
| 14            | 7             | 0           | 1.340723                | 0.272922  | -0.952461 |
| 15            | 8             | 0           | 1.409118                | 1.371301  | -0.288829 |
| 16            | 6             | 0           | 2.670831                | -0.246494 | -1.102201 |
| 17            | 1             | 0           | 3.217785                | 0.403067  | -1.772509 |
| 18            | 1             | 0           | 2.647225                | -1.252364 | -1.507520 |
| 19            | 6             | 0           | 3.299778                | -0.168221 | 0.338825  |
| 20            | 1             | 0           | 3.736502                | -1.135935 | 0.571420  |
| 21            | 1             | 0           | 4.085336                | 0.576334  | 0.349591  |
| 22            | 6             | 0           | 2.214366                | 0.166980  | 1.290529  |
| 23            | 1             | 0           | 2.261338                | 1.057458  | 1.888636  |
| 24            | 6             | 0           | 1.221060                | -0.770657 | 1.424336  |
| 25            | 1             | 0           | 1.455720                | -1.804990 | 1.219001  |
| 26            | 1             | 0           | 0.396775                | -0.607775 | 2.098657  |

## TS2 (Gas Phase)

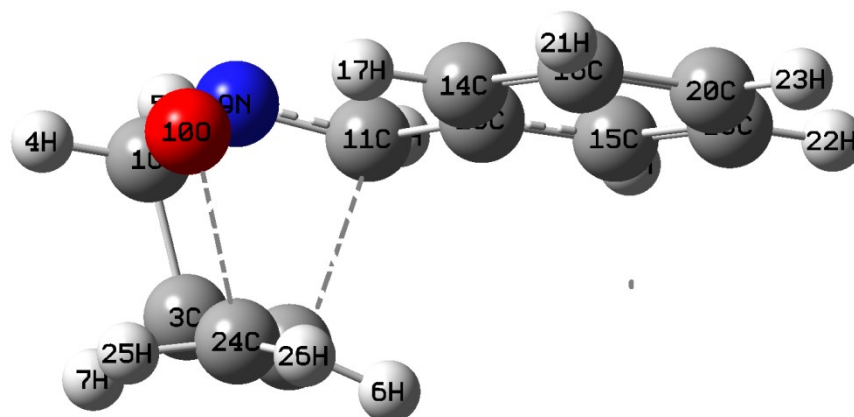

| Center Number | Atomic Number | Atomic Type | Coordinates (Angstroms) |           |           |
|---------------|---------------|-------------|-------------------------|-----------|-----------|
|               |               |             | X                       | Y         | Z         |
| 1             | 6             | 0           | -2.757081               | -0.296367 | -0.944405 |
| 2             | 6             | 0           | -1.631981               | -0.488902 | 1.236853  |
| 3             | 6             | 0           | -2.880568               | -0.871155 | 0.504575  |
| 4             | 1             | 0           | -3.465659               | 0.493136  | -1.149906 |
| 5             | 1             | 0           | -2.854982               | -1.072631 | -1.696229 |
| 6             | 1             | 0           | -1.004267               | -1.228837 | 1.702816  |
| 7             | 1             | 0           | -3.760906               | -0.455666 | 0.987419  |
| 8             | 1             | 0           | -3.006745               | -1.948607 | 0.463200  |
| 9             | 7             | 0           | -1.434256               | 0.298046  | -1.014397 |
| 10            | 8             | 0           | -1.395879               | 1.464844  | -0.470184 |
| 11            | 6             | 0           | -0.508422               | -0.566813 | -0.591894 |
| 12            | 1             | 0           | -0.703187               | -1.586446 | -0.892161 |
| 13            | 6             | 0           | 0.889510                | -0.257967 | -0.331876 |
| 14            | 6             | 0           | 1.420847                | 1.026240  | -0.259812 |
| 15            | 6             | 0           | 1.740430                | -1.342602 | -0.138608 |
| 16            | 6             | 0           | 2.765646                | 1.202332  | -0.004438 |
| 17            | 1             | 0           | 0.773404                | 1.868377  | -0.413063 |
| 18            | 6             | 0           | 3.078082                | -1.159734 | 0.130363  |
| 19            | 1             | 0           | 1.341139                | -2.343409 | -0.203196 |
| 20            | 6             | 0           | 3.597498                | 0.118879  | 0.198161  |
| 21            | 1             | 0           | 3.165929                | 2.202295  | 0.039709  |
| 22            | 1             | 0           | 3.717752                | -2.014040 | 0.279884  |
| 23            | 1             | 0           | 4.644493                | 0.269603  | 0.404325  |
| 24            | 6             | 0           | -1.494589               | 0.850280  | 1.505869  |
| 25            | 1             | 0           | -2.353719               | 1.497750  | 1.530712  |
| 26            | 1             | 0           | -0.602654               | 1.228239  | 1.980021  |



## TS3 (Gas Phase)

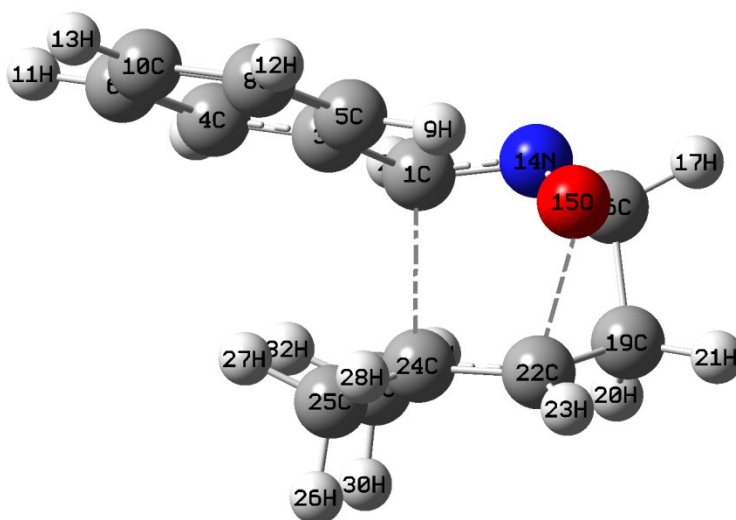

| Center Number | Atomic Number | Atomic Type | Coordinates (Angstroms) |           |           |
|---------------|---------------|-------------|-------------------------|-----------|-----------|
|               |               |             | X                       | Y         | Z         |
| 1             | 6             | 0           | -0.294625               | -0.256106 | -0.874890 |
| 2             | 1             | 0           | -0.481481               | 0.231619  | -1.820659 |
| 3             | 6             | 0           | 1.107753                | -0.271059 | -0.475851 |
| 4             | 6             | 0           | 1.961110                | 0.606727  | -1.137338 |
| 5             | 6             | 0           | 1.629694                | -1.083567 | 0.525902  |
| 6             | 6             | 0           | 3.298180                | 0.679825  | -0.810184 |
| 7             | 1             | 0           | 1.567548                | 1.231923  | -1.924728 |
| 8             | 6             | 0           | 2.971975                | -1.017940 | 0.835895  |
| 9             | 1             | 0           | 0.971941                | -1.755452 | 1.045291  |
| 10            | 6             | 0           | 3.809469                | -0.136591 | 0.179574  |
| 11            | 1             | 0           | 3.942267                | 1.366596  | -1.334668 |
| 12            | 1             | 0           | 3.367181                | -1.659510 | 1.606787  |
| 13            | 1             | 0           | 4.855041                | -0.087393 | 0.436235  |
| 14            | 7             | 0           | -1.145057               | -1.264602 | -0.620168 |
| 15            | 8             | 0           | -1.172803               | -1.645486 | 0.611920  |
| 16            | 6             | 0           | -2.500335               | -1.059400 | -1.053770 |
| 17            | 1             | 0           | -2.977301               | -2.023466 | -1.173536 |
| 18            | 1             | 0           | -2.520327               | -0.525244 | -1.998590 |
| 19            | 6             | 0           | -3.179741               | -0.278228 | 0.124529  |
| 20            | 1             | 0           | -3.761038               | 0.540795  | -0.290350 |
| 21            | 1             | 0           | -3.853788               | -0.940020 | 0.652783  |
| 22            | 6             | 0           | -2.101086               | 0.190380  | 1.023401  |
| 23            | 1             | 0           | -2.114432               | -0.087885 | 2.061984  |
| 24            | 6             | 0           | -1.180269               | 1.111570  | 0.545250  |
| 25            | 6             | 0           | -0.139266               | 1.606587  | 1.502631  |
| 26            | 1             | 0           | -0.521398               | 2.450123  | 2.077530  |
| 27            | 1             | 0           | 0.751882                | 1.945866  | 0.980544  |
| 28            | 1             | 0           | 0.160598                | 0.823275  | 2.191324  |
| 29            | 6             | 0           | -1.557236               | 2.123866  | -0.507859 |
| 30            | 1             | 0           | -2.043587               | 2.983991  | -0.047380 |
| 31            | 1             | 0           | -2.228332               | 1.727009  | -1.263508 |
| 32            | 1             | 0           | -0.670687               | 2.497497  | -1.016993 |

## TS4 (Gas Phase)

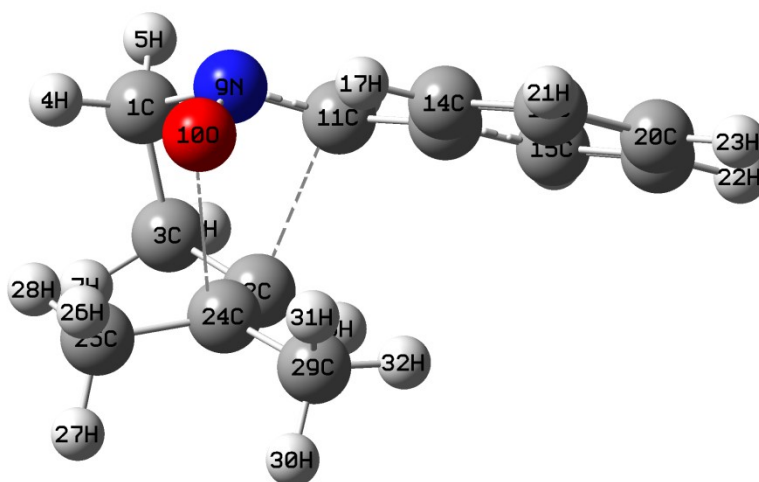

| Center Number | Atomic Number | Atomic Type | Coordinates (Angstroms) |           |           |
|---------------|---------------|-------------|-------------------------|-----------|-----------|
|               |               |             | X                       | Y         | Z         |
| 1             | 6             | 0           | 2.324131                | -1.534480 | 0.668311  |
| 2             | 6             | 0           | 1.456797                | -0.156635 | -1.170073 |
| 3             | 6             | 0           | 2.520444                | -1.150887 | -0.832488 |
| 4             | 1             | 0           | 3.074798                | -1.105423 | 1.318171  |
| 5             | 1             | 0           | 2.299202                | -2.610081 | 0.808940  |
| 6             | 1             | 0           | 0.813110                | -0.309886 | -2.020835 |
| 7             | 1             | 0           | 3.523494                | -0.763261 | -0.986283 |
| 8             | 1             | 0           | 2.420427                | -2.037216 | -1.451951 |
| 9             | 7             | 0           | 1.056579                | -0.943907 | 1.059404  |
| 10            | 8             | 0           | 1.176828                | 0.305121  | 1.369316  |
| 11            | 6             | 0           | 0.116712                | -1.206428 | 0.148450  |
| 12            | 1             | 0           | 0.190264                | -2.194686 | -0.283969 |
| 13            | 6             | 0           | -1.216092               | -0.621996 | 0.138263  |
| 14            | 6             | 0           | -1.656611               | 0.333662  | 1.047632  |
| 15            | 6             | 0           | -2.099400               | -1.074965 | -0.836759 |
| 16            | 6             | 0           | -2.946792               | 0.816381  | 0.969203  |
| 17            | 1             | 0           | -0.976420               | 0.689125  | 1.799629  |
| 18            | 6             | 0           | -3.380110               | -0.576039 | -0.921223 |
| 19            | 1             | 0           | -1.771478               | -1.828308 | -1.537026 |
| 20            | 6             | 0           | -3.809412               | 0.375069  | -0.015428 |
| 21            | 1             | 0           | -3.279246               | 1.551301  | 1.684375  |
| 22            | 1             | 0           | -4.047142               | -0.935254 | -1.687768 |
| 23            | 1             | 0           | -4.812062               | 0.765924  | -0.073593 |
| 24            | 6             | 0           | 1.505197                | 1.085600  | -0.559929 |
| 25            | 6             | 0           | 2.771079                | 1.696815  | -0.047275 |
| 26            | 1             | 0           | 2.560618                | 2.356320  | 0.788232  |
| 27            | 1             | 0           | 3.232613                | 2.291045  | -0.837471 |
| 28            | 1             | 0           | 3.486359                | 0.958226  | 0.292569  |
| 29            | 6             | 0           | 0.420373                | 2.070464  | -0.837262 |
| 30            | 1             | 0           | 0.805268                | 2.900441  | -1.429067 |
| 31            | 1             | 0           | 0.046841                | 2.479871  | 0.098331  |
| 32            | 1             | 0           | -0.415231               | 1.618873  | -1.361179 |

TS5 (Gas Phase)

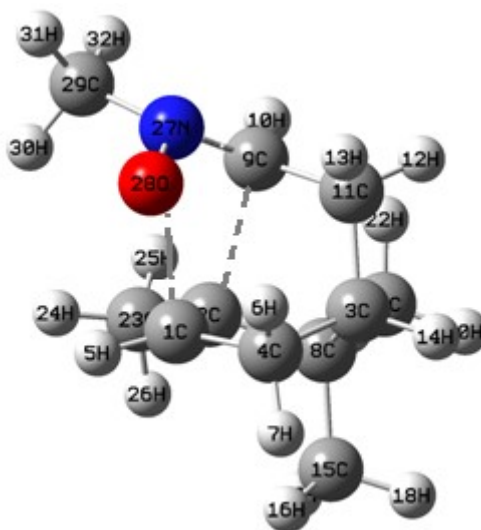

| Center Number | Atomic Number | Atomic Type | Coordinates (Angstroms) |           |           |
|---------------|---------------|-------------|-------------------------|-----------|-----------|
|               |               |             | X                       | Y         | Z         |
| 1             | 6             | 0           | -0.141633               | -0.368809 | -1.382489 |
| 2             | 6             | 0           | 0.289771                | 0.642253  | -0.536957 |
| 3             | 6             | 0           | 1.060988                | -1.293192 | 0.384555  |
| 4             | 6             | 0           | 0.534541                | -1.648531 | -1.004607 |
| 5             | 1             | 0           | -0.613172               | -0.211290 | -2.335821 |
| 6             | 1             | 0           | -0.164073               | -2.479190 | -0.990675 |
| 7             | 1             | 0           | 1.347114                | -1.902160 | -1.684805 |
| 8             | 6             | 0           | 1.537706                | 0.147834  | 0.195212  |
| 9             | 6             | 0           | -0.948211               | 0.015086  | 1.046467  |
| 10            | 1             | 0           | -0.987301               | 0.813564  | 1.772826  |
| 11            | 6             | 0           | -0.119298               | -1.205441 | 1.348345  |
| 12            | 1             | 0           | 0.232131                | -1.154890 | 2.375276  |
| 13            | 1             | 0           | -0.757176               | -2.079592 | 1.251263  |
| 14            | 1             | 0           | 1.827589                | -1.974955 | 0.744058  |
| 15            | 6             | 0           | 2.766886                | 0.246579  | -0.701175 |
| 16            | 1             | 0           | 2.614164                | -0.227697 | -1.664145 |
| 17            | 1             | 0           | 3.016037                | 1.289434  | -0.885701 |
| 18            | 1             | 0           | 3.630117                | -0.212175 | -0.222677 |
| 19            | 6             | 0           | 1.863486                | 0.895406  | 1.475605  |
| 20            | 1             | 0           | 2.745636                | 0.469627  | 1.948759  |
| 21            | 1             | 0           | 2.087217                | 1.936115  | 1.249624  |
| 22            | 1             | 0           | 1.061277                | 0.885324  | 2.204067  |
| 23            | 6             | 0           | 0.103825                | 2.100159  | -0.811894 |
| 24            | 1             | 0           | -0.661557               | 2.267895  | -1.564085 |
| 25            | 1             | 0           | -0.174693               | 2.661553  | 0.077862  |
| 26            | 1             | 0           | 1.027558                | 2.541585  | -1.187042 |
| 27            | 7             | 0           | -2.069553               | -0.156730 | 0.357656  |
| 28            | 8             | 0           | -1.965609               | -0.978734 | -0.618314 |
| 29            | 6             | 0           | -2.999688               | 0.925019  | 0.161219  |
| 30            | 1             | 0           | -2.707365               | 1.493575  | -0.719647 |
| 31            | 1             | 0           | -3.983359               | 0.504077  | -0.005350 |
| 32            | 1             | 0           | -3.018631               | 1.568009  | 1.033449  |

## TS6 (Gas Phase)

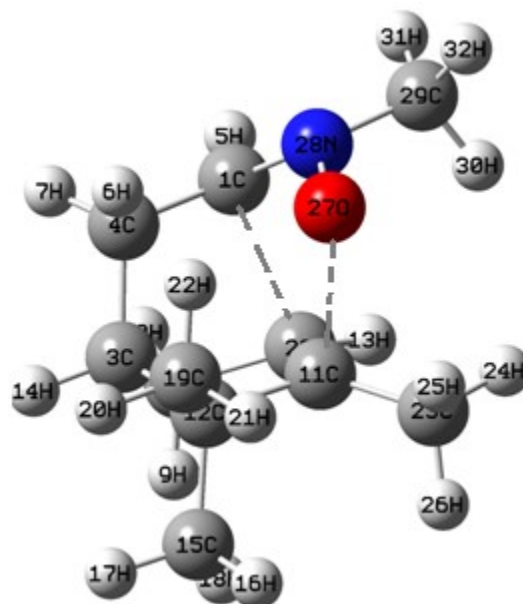

| Center Number | Atomic Number | Atomic Type | Coordinates (Angstroms) |           |           |
|---------------|---------------|-------------|-------------------------|-----------|-----------|
|               |               |             | X                       | Y         | Z         |
| 1             | 6             | 0           | -1.433479               | -1.127132 | 0.057616  |
| 2             | 6             | 0           | -0.164909               | -0.244283 | -1.383743 |
| 3             | 6             | 0           | 1.041497                | -1.377453 | 0.163237  |
| 4             | 6             | 0           | -0.285936               | -1.695347 | 0.850644  |
| 5             | 1             | 0           | -2.088475               | -1.799138 | -0.476967 |
| 6             | 1             | 0           | -0.336066               | -1.292532 | 1.856687  |
| 7             | 1             | 0           | -0.400767               | -2.774460 | 0.913857  |
| 8             | 6             | 0           | 0.686788                | -1.485365 | -1.309347 |
| 9             | 1             | 0           | 1.554056                | -1.441620 | -1.964137 |
| 10            | 1             | 0           | 0.149170                | -2.403068 | -1.540499 |
| 11            | 6             | 0           | 0.333876                | 0.736538  | -0.542735 |
| 12            | 6             | 0           | 1.428285                | 0.105540  | 0.300527  |
| 13            | 1             | 0           | -0.762982               | -0.003706 | -2.250866 |
| 14            | 1             | 0           | 1.835963                | -2.038878 | 0.499706  |
| 15            | 6             | 0           | 2.775256                | 0.360524  | -0.379781 |
| 16            | 1             | 0           | 3.056154                | 1.404418  | -0.266491 |
| 17            | 1             | 0           | 3.553287                | -0.241870 | 0.084440  |
| 18            | 1             | 0           | 2.758713                | 0.139715  | -1.442492 |
| 19            | 6             | 0           | 1.541925                | 0.602326  | 1.728673  |
| 20            | 1             | 0           | 2.354302                | 0.083873  | 2.235316  |
| 21            | 1             | 0           | 1.780398                | 1.663687  | 1.737382  |
| 22            | 1             | 0           | 0.624614                | 0.472437  | 2.284665  |
| 23            | 6             | 0           | 0.292593                | 2.201769  | -0.790911 |
| 24            | 1             | 0           | -0.591750               | 2.475518  | -1.357364 |
| 25            | 1             | 0           | 0.280112                | 2.759438  | 0.139379  |
| 26            | 1             | 0           | 1.166370                | 2.513168  | -1.364952 |
| 27            | 8             | 0           | -1.159225               | 0.847659  | 0.955197  |
| 28            | 7             | 0           | -1.991431               | -0.009795 | 0.486986  |
| 29            | 6             | 0           | -3.130794               | 0.540822  | -0.199822 |
| 30            | 1             | 0           | -2.791320               | 1.059500  | -1.096284 |
| 31            | 1             | 0           | -3.825184               | -0.247240 | -0.467358 |
| 32            | 1             | 0           | -3.613387               | 1.250412  | 0.459358  |

## TS7 (Gas Phase)

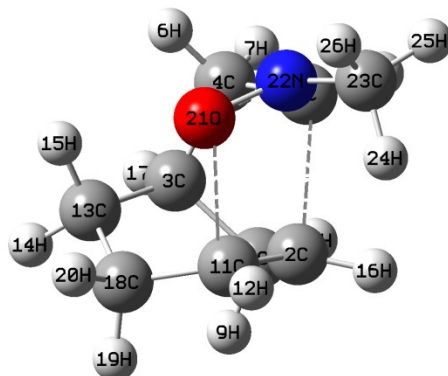

| Center Number | Atomic Number | Atomic Type | Coordinates (Angstroms) |           |           |
|---------------|---------------|-------------|-------------------------|-----------|-----------|
|               |               |             | X                       | Y         | Z         |
| 1             | 6             | 0           | -0.932800               | 1.127485  | 0.031460  |
| 2             | 6             | 0           | 0.202202                | -0.087654 | 1.394318  |
| 3             | 6             | 0           | 1.573032                | 0.922696  | -0.289963 |
| 4             | 6             | 0           | 0.267396                | 1.574062  | -0.747315 |
| 5             | 1             | 0           | -1.472853               | 1.860836  | 0.611198  |
| 6             | 1             | 0           | 0.082353                | 1.358346  | -1.796913 |
| 7             | 1             | 0           | 0.352228                | 2.652841  | -0.638670 |
| 8             | 6             | 0           | 1.429487                | 0.755083  | 1.214273  |
| 9             | 1             | 0           | 2.314214                | 0.274478  | 1.635472  |
| 10            | 1             | 0           | 1.323720                | 1.722407  | 1.700475  |
| 11            | 6             | 0           | 0.186438                | -1.279369 | 0.708764  |
| 12            | 1             | 0           | -0.474924               | -2.074882 | 1.009499  |
| 13            | 6             | 0           | 1.836419                | -0.429320 | -0.960860 |
| 14            | 1             | 0           | 2.901439                | -0.533001 | -1.156666 |
| 15            | 1             | 0           | 1.330323                | -0.450078 | -1.920260 |
| 16            | 1             | 0           | -0.412839               | 0.033453  | 2.273465  |
| 17            | 1             | 0           | 2.393148                | 1.595337  | -0.530576 |
| 18            | 6             | 0           | 1.368556                | -1.620243 | -0.128429 |
| 19            | 1             | 0           | 2.175334                | -1.934192 | 0.539289  |
| 20            | 1             | 0           | 1.150384                | -2.465537 | -0.772605 |
| 21            | 8             | 0           | -1.046423               | -0.842031 | -0.949361 |
| 22            | 7             | 0           | -1.678330               | 0.144035  | -0.441856 |
| 23            | 6             | 0           | -2.913859               | -0.198950 | 0.212957  |
| 24            | 1             | 0           | -2.683359               | -0.817718 | 1.081579  |
| 25            | 1             | 0           | -3.443657               | 0.694679  | 0.520154  |
| 26            | 1             | 0           | -3.517040               | -0.771707 | -0.478784 |

## TS8 (Gas Phase)

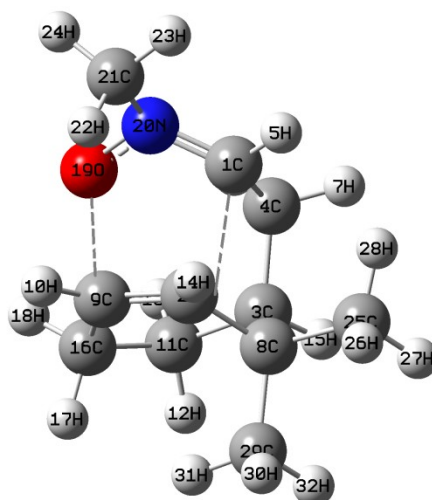

| Center Number | Atomic Number | Atomic Type | Coordinates (Angstroms) |           |           |
|---------------|---------------|-------------|-------------------------|-----------|-----------|
|               |               |             | X                       | Y         | Z         |
| 1             | 6             | 0           | -1.081377               | -1.022504 | 0.513663  |
| 2             | 6             | 0           | 0.176686                | -0.278682 | -1.056657 |
| 3             | 6             | 0           | 1.146400                | 0.049600  | 1.085475  |
| 4             | 6             | 0           | -0.141309               | -0.598318 | 1.602571  |
| 5             | 1             | 0           | -1.251715               | -2.075939 | 0.351413  |
| 6             | 1             | 0           | -0.679039               | 0.098277  | 2.239906  |
| 7             | 1             | 0           | 0.103803                | -1.473612 | 2.198827  |
| 8             | 6             | 0           | 1.434479                | -0.582488 | -0.276721 |
| 9             | 6             | 0           | -0.281769               | 1.019839  | -1.087930 |
| 10            | 1             | 0           | -0.927678               | 1.334591  | -1.891566 |
| 11            | 6             | 0           | 1.043624                | 1.572190  | 0.978310  |
| 12            | 1             | 0           | 2.043963                | 1.991129  | 1.062521  |
| 13            | 1             | 0           | 0.487762                | 1.935600  | 1.837771  |
| 14            | 1             | 0           | -0.094691               | -0.945009 | -1.865117 |
| 15            | 1             | 0           | 1.953926                | -0.179531 | 1.781082  |
| 16            | 6             | 0           | 0.391129                | 2.093237  | -0.306316 |
| 17            | 1             | 0           | 1.139014                | 2.572910  | -0.939168 |
| 18            | 1             | 0           | -0.339754               | 2.858943  | -0.068897 |
| 19            | 8             | 0           | -1.890384               | 1.000992  | 0.241261  |
| 20            | 7             | 0           | -2.123999               | -0.253968 | 0.248341  |
| 21            | 6             | 0           | -3.124447               | -0.692075 | -0.689297 |
| 22            | 1             | 0           | -2.756440               | -0.502030 | -1.698486 |
| 23            | 1             | 0           | -3.332046               | -1.747327 | -0.558675 |
| 24            | 1             | 0           | -4.022668               | -0.111827 | -0.524660 |
| 25            | 6             | 0           | 1.667975                | -2.079988 | -0.154174 |
| 26            | 1             | 0           | 1.806814                | -2.520401 | -1.139156 |
| 27            | 1             | 0           | 2.567627                | -2.276114 | 0.425515  |
| 28            | 1             | 0           | 0.846079                | -2.601562 | 0.325084  |
| 29            | 6             | 0           | 2.676941                | 0.011398  | -0.927894 |
| 30            | 1             | 0           | 2.852266                | -0.453045 | -1.895172 |
| 31            | 1             | 0           | 2.588858                | 1.079672  | -1.086834 |
| 32            | 1             | 0           | 3.554986                | -0.168129 | -0.309039 |

MPWB1K/6-311G(d,p) computed unique imaginary frequency, and Cartesian coordinates of the stationary points involved in the IM32CA reactions of nitrones **15**, **18**, **20**, **24** and **26** in toluene

Nitron **15** (Toluene)

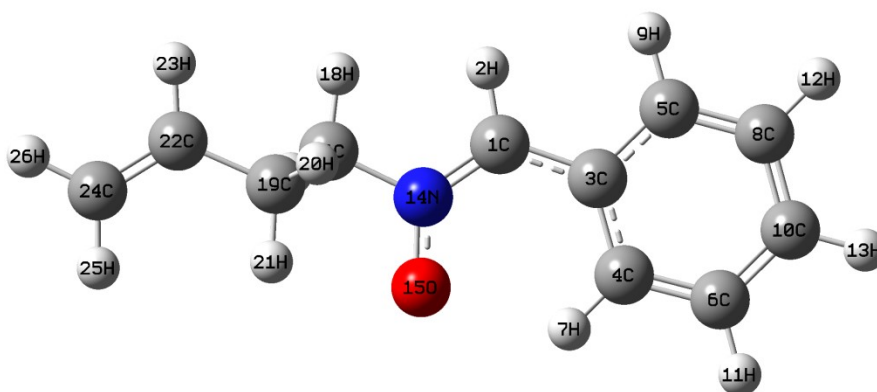

| Center Number | Atomic Number | Atomic Type | Coordinates (Angstroms) |           |           |
|---------------|---------------|-------------|-------------------------|-----------|-----------|
|               |               |             | X                       | Y         | Z         |
| 1             | 6             | 0           | 0.263977                | -0.692751 | 0.267226  |
| 2             | 1             | 0           | 0.034240                | -1.743482 | 0.308224  |
| 3             | 6             | 0           | 1.639576                | -0.300034 | 0.087360  |
| 4             | 6             | 0           | 2.080784                | 1.019801  | -0.007979 |
| 5             | 6             | 0           | 2.579163                | -1.328602 | 0.002191  |
| 6             | 6             | 0           | 3.423954                | 1.284422  | -0.184369 |
| 7             | 1             | 0           | 1.363216                | 1.815669  | 0.056897  |
| 8             | 6             | 0           | 3.916074                | -1.053960 | -0.171773 |
| 9             | 1             | 0           | 2.247414                | -2.354066 | 0.075033  |
| 10            | 6             | 0           | 4.344377                | 0.258235  | -0.266342 |
| 11            | 1             | 0           | 3.753659                | 2.309160  | -0.258066 |
| 12            | 1             | 0           | 4.626549                | -1.863385 | -0.234102 |
| 13            | 1             | 0           | 5.391875                | 0.477227  | -0.403373 |
| 14            | 7             | 0           | -0.750923               | 0.101959  | 0.394211  |
| 15            | 8             | 0           | -0.709515               | 1.358544  | 0.382235  |
| 16            | 6             | 0           | -2.094152               | -0.459585 | 0.564293  |
| 17            | 1             | 0           | -2.450906               | -0.098035 | 1.523778  |
| 18            | 1             | 0           | -2.024659               | -1.541618 | 0.591928  |
| 19            | 6             | 0           | -3.004120               | 0.019846  | -0.548336 |
| 20            | 1             | 0           | -2.591785               | -0.315470 | -1.500301 |
| 21            | 1             | 0           | -2.996548               | 1.104485  | -0.549467 |
| 22            | 6             | 0           | -4.388811               | -0.500602 | -0.379855 |
| 23            | 1             | 0           | -4.512668               | -1.575895 | -0.433887 |
| 24            | 6             | 0           | -5.446601               | 0.258806  | -0.167969 |
| 25            | 1             | 0           | -5.361596               | 1.334013  | -0.109858 |
| 26            | 1             | 0           | -6.431534               | -0.164119 | -0.050845 |

## Nitrone 18 (Toluene)

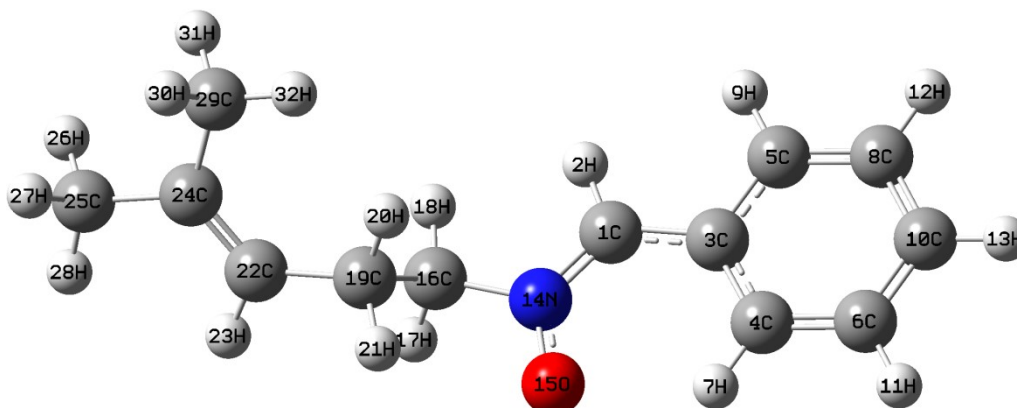

| Center Number | Atomic Number | Atomic Type | Coordinates (Angstroms) |           |           |
|---------------|---------------|-------------|-------------------------|-----------|-----------|
|               |               |             | X                       | Y         | Z         |
| 1             | 6             | 0           | 1.054684                | 0.243169  | -0.582898 |
| 2             | 1             | 0           | 0.665317                | 1.133050  | -1.046569 |
| 3             | 6             | 0           | 2.450923                | 0.219613  | -0.225779 |
| 4             | 6             | 0           | 3.103430                | -0.856170 | 0.374777  |
| 5             | 6             | 0           | 3.184013                | 1.372562  | -0.510100 |
| 6             | 6             | 0           | 4.447677                | -0.764518 | 0.675742  |
| 7             | 1             | 0           | 2.547578                | -1.746185 | 0.597354  |
| 8             | 6             | 0           | 4.523128                | 1.455018  | -0.205276 |
| 9             | 1             | 0           | 2.687814                | 2.211485  | -0.975764 |
| 10            | 6             | 0           | 5.161964                | 0.382487  | 0.391193  |
| 11            | 1             | 0           | 4.941364                | -1.603971 | 1.140375  |
| 12            | 1             | 0           | 5.071092                | 2.356095  | -0.432391 |
| 13            | 1             | 0           | 6.211906                | 0.442470  | 0.631971  |
| 14            | 7             | 0           | 0.193543                | -0.708255 | -0.407050 |
| 15            | 8             | 0           | 0.426237                | -1.829574 | 0.111370  |
| 16            | 6             | 0           | -1.197774               | -0.503020 | -0.823862 |
| 17            | 1             | 0           | -1.407721               | -1.284601 | -1.548167 |
| 18            | 1             | 0           | -1.285442               | 0.463804  | -1.306095 |
| 19            | 6             | 0           | -2.129522               | -0.618969 | 0.365533  |
| 20            | 1             | 0           | -1.907476               | 0.174619  | 1.072340  |
| 21            | 1             | 0           | -1.902363               | -1.561296 | 0.858111  |
| 22            | 6             | 0           | -3.551931               | -0.596682 | -0.072534 |
| 23            | 1             | 0           | -3.854047               | -1.444147 | -0.677206 |
| 24            | 6             | 0           | -4.471822               | 0.324984  | 0.184973  |
| 25            | 6             | 0           | -5.864108               | 0.176053  | -0.333865 |
| 26            | 1             | 0           | -6.134432               | 1.022036  | -0.964302 |
| 27            | 1             | 0           | -6.581219               | 0.156525  | 0.485629  |
| 28            | 1             | 0           | -5.981877               | -0.734183 | -0.912148 |
| 29            | 6             | 0           | -4.245576               | 1.556314  | 0.996592  |
| 30            | 1             | 0           | -4.880946               | 1.547016  | 1.881050  |
| 31            | 1             | 0           | -4.524582               | 2.439684  | 0.424512  |
| 32            | 1             | 0           | -3.220174               | 1.676929  | 1.322713  |



Nitrono **20** (Toluene)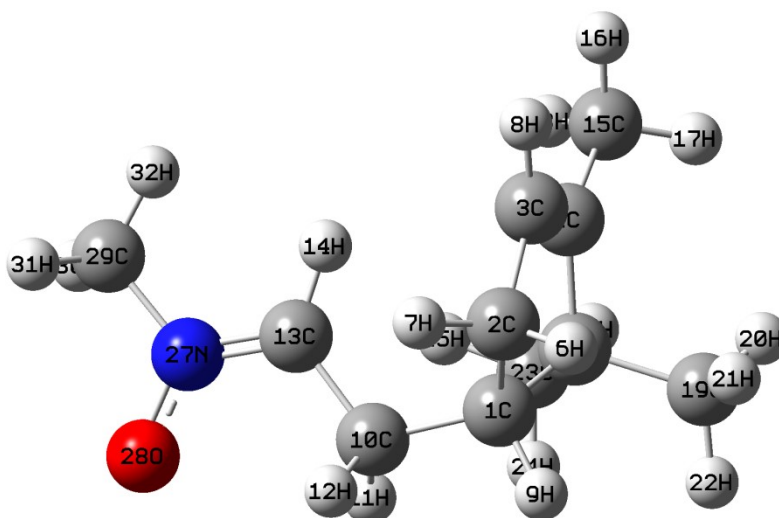

| Center Number | Atomic Number | Atomic Type | Coordinates (Angstroms) |           |           |
|---------------|---------------|-------------|-------------------------|-----------|-----------|
|               |               |             | X                       | Y         | Z         |
| 1             | 6             | 0           | 0.638361                | -1.195970 | 0.536252  |
| 2             | 6             | 0           | 0.873955                | -0.500931 | 1.884245  |
| 3             | 6             | 0           | 1.363460                | 0.855394  | 1.497096  |
| 4             | 6             | 0           | 1.695525                | 0.923479  | 0.217132  |
| 5             | 6             | 0           | 1.535532                | -0.420833 | -0.459147 |
| 6             | 1             | 0           | 1.617453                | -1.023326 | 2.487812  |
| 7             | 1             | 0           | -0.036618               | -0.467035 | 2.483442  |
| 8             | 1             | 0           | 1.464136                | 1.669512  | 2.200081  |
| 9             | 1             | 0           | 0.969409                | -2.231745 | 0.575639  |
| 10            | 6             | 0           | -0.839605               | -1.233002 | 0.183760  |
| 11            | 1             | 0           | -1.008187               | -1.685353 | -0.794245 |
| 12            | 1             | 0           | -1.361084               | -1.894390 | 0.879256  |
| 13            | 6             | 0           | -1.527505               | 0.073001  | 0.208559  |
| 14            | 1             | 0           | -1.041982               | 0.993369  | 0.476262  |
| 15            | 6             | 0           | 2.240565                | 2.098958  | -0.505939 |
| 16            | 1             | 0           | 2.374157                | 2.946090  | 0.158492  |
| 17            | 1             | 0           | 3.203000                | 1.868865  | -0.960789 |
| 18            | 1             | 0           | 1.578172                | 2.400939  | -1.315645 |
| 19            | 6             | 0           | 2.904290                | -1.093835 | -0.519145 |
| 20            | 1             | 0           | 3.614605                | -0.497028 | -1.086894 |
| 21            | 1             | 0           | 3.305345                | -1.234611 | 0.481847  |
| 22            | 1             | 0           | 2.829110                | -2.067651 | -0.998779 |
| 23            | 6             | 0           | 0.976242                | -0.316673 | -1.866497 |
| 24            | 1             | 0           | 0.808231                | -1.303710 | -2.290800 |
| 25            | 1             | 0           | 0.034494                | 0.225714  | -1.895067 |
| 26            | 1             | 0           | 1.680183                | 0.201855  | -2.513453 |
| 27            | 7             | 0           | -2.776523               | 0.118816  | -0.099695 |
| 28            | 8             | 0           | -3.455688               | -0.892423 | -0.426806 |
| 29            | 6             | 0           | -3.504566               | 1.378213  | -0.091145 |
| 30            | 1             | 0           | -3.899376               | 1.531758  | -1.087818 |
| 31            | 1             | 0           | -4.329191               | 1.271579  | 0.602620  |
| 32            | 1             | 0           | -2.858217               | 2.196039  | 0.199327  |

## Nitron 24 (Toluene)

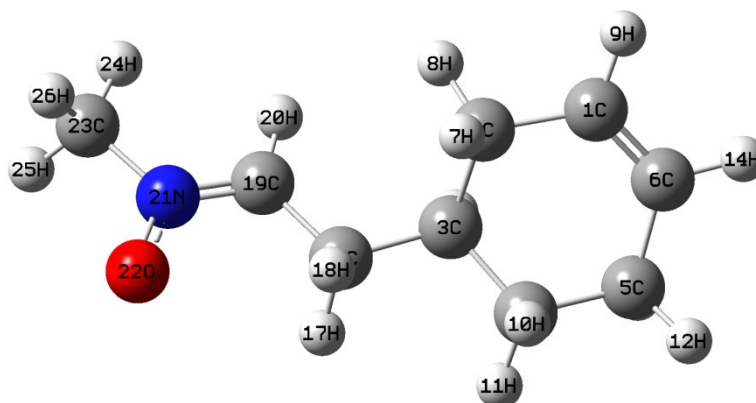

| Center Number | Atomic Number | Atomic Type | Coordinates (Angstroms) |           |           |
|---------------|---------------|-------------|-------------------------|-----------|-----------|
|               |               |             | X                       | Y         | Z         |
| 1             | 6             | 0           | 2.604120                | 1.406156  | 0.345751  |
| 2             | 6             | 0           | 1.155035                | 1.070457  | 0.469896  |
| 3             | 6             | 0           | 0.799492                | -0.214429 | -0.259394 |
| 4             | 6             | 0           | 1.832718                | -1.276139 | 0.066527  |
| 5             | 6             | 0           | 3.206290                | -0.869673 | -0.426085 |
| 6             | 6             | 0           | 3.517258                | 0.546621  | -0.074968 |
| 7             | 1             | 0           | 0.886554                | 0.972642  | 1.525304  |
| 8             | 1             | 0           | 0.558342                | 1.901365  | 0.093230  |
| 9             | 1             | 0           | 2.903385                | 2.411043  | 0.610544  |
| 10            | 1             | 0           | 1.860727                | -1.411968 | 1.148698  |
| 11            | 1             | 0           | 1.542232                | -2.231488 | -0.365609 |
| 12            | 1             | 0           | 3.967382                | -1.525071 | -0.005538 |
| 13            | 1             | 0           | 3.271877                | -0.999318 | -1.508431 |
| 14            | 1             | 0           | 4.545708                | 0.868416  | -0.166019 |
| 15            | 1             | 0           | 0.853371                | -0.018338 | -1.334211 |
| 16            | 6             | 0           | -0.598887               | -0.687691 | 0.079105  |
| 17            | 1             | 0           | -0.791053               | -1.669526 | -0.360403 |
| 18            | 1             | 0           | -0.706558               | -0.843698 | 1.155110  |
| 19            | 6             | 0           | -1.665240               | 0.231019  | -0.361659 |
| 20            | 1             | 0           | -1.486432               | 1.093757  | -0.980284 |
| 21            | 7             | 0           | -2.881555               | -0.012574 | -0.019311 |
| 22            | 8             | 0           | -3.223988               | -0.998264 | 0.688130  |
| 23            | 6             | 0           | -3.969982               | 0.856563  | -0.439039 |
| 24            | 1             | 0           | -3.600001               | 1.678523  | -1.037860 |
| 25            | 1             | 0           | -4.669421               | 0.251355  | -1.002096 |
| 26            | 1             | 0           | -4.458146               | 1.219138  | 0.456900  |

## Nitron 26 (Toluene)

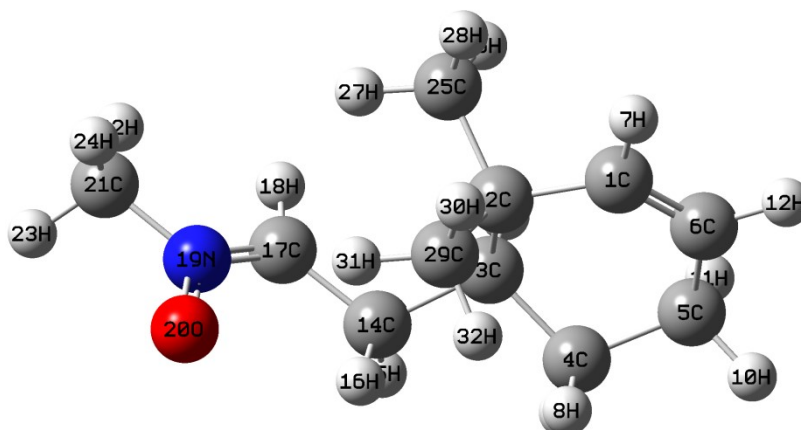

| Center Number | Atomic Number | Atomic Type | Coordinates (Angstroms) |           |           |
|---------------|---------------|-------------|-------------------------|-----------|-----------|
|               |               |             | X                       | Y         | Z         |
| 1             | 6             | 0           | 2.341525                | 1.207767  | 0.099594  |
| 2             | 6             | 0           | 0.888680                | 0.822314  | 0.064099  |
| 3             | 6             | 0           | 0.746396                | -0.635144 | -0.415712 |
| 4             | 6             | 0           | 1.836776                | -1.512673 | 0.178448  |
| 5             | 6             | 0           | 3.214671                | -1.072873 | -0.257224 |
| 6             | 6             | 0           | 3.369999                | 0.396410  | -0.073769 |
| 7             | 1             | 0           | 2.525803                | 2.263703  | 0.259358  |
| 8             | 1             | 0           | 1.771378                | -1.465430 | 1.265961  |
| 9             | 1             | 0           | 1.662454                | -2.550072 | -0.100517 |
| 10            | 1             | 0           | 3.978451                | -1.598897 | 0.313181  |
| 11            | 1             | 0           | 3.386729                | -1.339663 | -1.302237 |
| 12            | 1             | 0           | 4.371983                | 0.803230  | -0.067442 |
| 13            | 1             | 0           | 0.883512                | -0.629953 | -1.500932 |
| 14            | 6             | 0           | -0.602467               | -1.282047 | -0.098842 |
| 15            | 1             | 0           | -0.560486               | -2.309839 | -0.464831 |
| 16            | 1             | 0           | -0.758598               | -1.333621 | 0.974614  |
| 17            | 6             | 0           | -1.785498               | -0.637864 | -0.697879 |
| 18            | 1             | 0           | -1.862611               | -0.474510 | -1.759792 |
| 19            | 7             | 0           | -2.793886               | -0.269549 | 0.014556  |
| 20            | 8             | 0           | -2.885803               | -0.385652 | 1.269055  |
| 21            | 6             | 0           | -3.948297               | 0.353989  | -0.616220 |
| 22            | 1             | 0           | -3.822754               | 0.410706  | -1.689621 |
| 23            | 1             | 0           | -4.816085               | -0.239861 | -0.358447 |
| 24            | 1             | 0           | -4.056745               | 1.341838  | -0.185332 |
| 25            | 6             | 0           | 0.212884                | 1.789791  | -0.903760 |
| 26            | 1             | 0           | 0.587772                | 1.655169  | -1.915790 |
| 27            | 1             | 0           | -0.864760               | 1.661676  | -0.912009 |
| 28            | 1             | 0           | 0.415277                | 2.816521  | -0.605990 |
| 29            | 6             | 0           | 0.288421                | 1.023415  | 1.450686  |
| 30            | 1             | 0           | 0.491984                | 2.033073  | 1.800185  |
| 31            | 1             | 0           | -0.789736               | 0.875505  | 1.447235  |
| 32            | 1             | 0           | 0.721508                | 0.333977  | 2.171538  |

## Isoxazolidine 16 (Toluene)

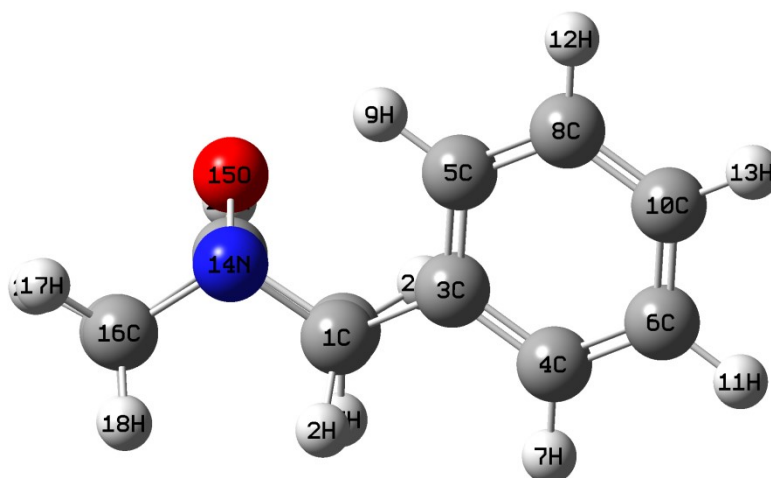

| Center Number | Atomic Number | Atomic Type | Coordinates (Angstroms) |           |           |
|---------------|---------------|-------------|-------------------------|-----------|-----------|
|               |               |             | X                       | Y         | Z         |
| 1             | 6             | 0           | -0.473921               | 0.527105  | -0.408767 |
| 2             | 1             | 0           | -0.588525               | 1.218041  | -1.240279 |
| 3             | 6             | 0           | 0.984005                | 0.213947  | -0.245398 |
| 4             | 6             | 0           | 1.905510                | 1.247433  | -0.303339 |
| 5             | 6             | 0           | 1.432238                | -1.071652 | 0.000312  |
| 6             | 6             | 0           | 3.251400                | 1.004550  | -0.115653 |
| 7             | 1             | 0           | 1.565191                | 2.254164  | -0.500495 |
| 8             | 6             | 0           | 2.779850                | -1.315892 | 0.185830  |
| 9             | 1             | 0           | 0.718686                | -1.877472 | 0.040799  |
| 10            | 6             | 0           | 3.693335                | -0.281604 | 0.130397  |
| 11            | 1             | 0           | 3.956792                | 1.819363  | -0.167991 |
| 12            | 1             | 0           | 3.117331                | -2.323347 | 0.374139  |
| 13            | 1             | 0           | 4.744591                | -0.475803 | 0.274472  |
| 14            | 7             | 0           | -1.274321               | -0.669803 | -0.700608 |
| 15            | 8             | 0           | -1.614491               | -1.110786 | 0.598847  |
| 16            | 6             | 0           | -2.588234               | -0.258479 | -1.200840 |
| 17            | 1             | 0           | -3.094260               | -1.140808 | -1.573911 |
| 18            | 1             | 0           | -2.464807               | 0.441050  | -2.020040 |
| 19            | 6             | 0           | -3.303773               | 0.325856  | 0.028699  |
| 20            | 1             | 0           | -3.553837               | 1.376273  | -0.074902 |
| 21            | 1             | 0           | -4.208067               | -0.225577 | 0.261059  |
| 22            | 6             | 0           | -2.225838               | 0.087236  | 1.070079  |
| 23            | 1             | 0           | -2.568171               | -0.063678 | 2.085582  |
| 24            | 6             | 0           | -1.108794               | 1.090929  | 0.886513  |
| 25            | 1             | 0           | -1.460851               | 2.111365  | 0.779923  |
| 26            | 1             | 0           | -0.402563               | 1.044764  | 1.708127  |

## Isoxazolidine 17 (Toluene)

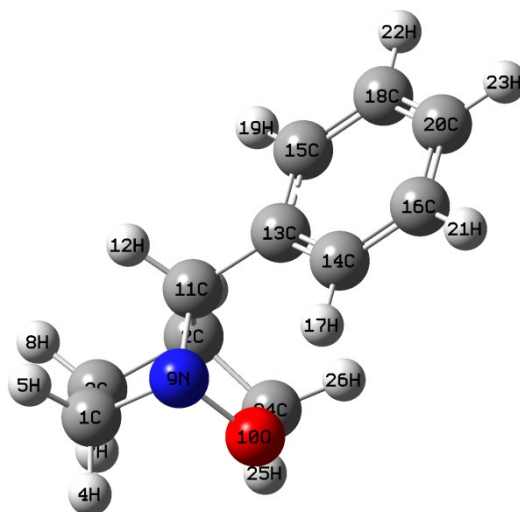

| Center Number | Atomic Number | Atomic Type | Coordinates (Angstroms) |           |           |
|---------------|---------------|-------------|-------------------------|-----------|-----------|
|               |               |             | X                       | Y         | Z         |
| 1             | 6             | 0           | 2.759577                | -0.365841 | -0.886102 |
| 2             | 6             | 0           | 1.444307                | 1.005593  | 0.513769  |
| 3             | 6             | 0           | 2.840663                | 0.954391  | -0.088789 |
| 4             | 1             | 0           | 3.457990                | -1.123070 | -0.553951 |
| 5             | 1             | 0           | 2.893610                | -0.214792 | -1.953155 |
| 6             | 1             | 0           | 1.112804                | 1.969927  | 0.878526  |
| 7             | 1             | 0           | 3.613680                | 0.937989  | 0.673109  |
| 8             | 1             | 0           | 3.025522                | 1.804472  | -0.739117 |
| 9             | 7             | 0           | 1.402713                | -0.868414 | -0.667620 |
| 10            | 8             | 0           | 1.386878                | -1.286797 | 0.694751  |
| 11            | 6             | 0           | 0.627481                | 0.365621  | -0.613569 |
| 12            | 1             | 0           | 0.776858                | 0.895070  | -1.553884 |
| 13            | 6             | 0           | -0.832591               | 0.174874  | -0.353158 |
| 14            | 6             | 0           | -1.404205               | -1.083480 | -0.277098 |
| 15            | 6             | 0           | -1.638136               | 1.292343  | -0.197058 |
| 16            | 6             | 0           | -2.760157               | -1.217997 | -0.045922 |
| 17            | 1             | 0           | -0.777712               | -1.951819 | -0.396495 |
| 18            | 6             | 0           | -2.992224               | 1.157715  | 0.033275  |
| 19            | 1             | 0           | -1.200767               | 2.278481  | -0.261362 |
| 20            | 6             | 0           | -3.557433               | -0.101273 | 0.110626  |
| 21            | 1             | 0           | -3.195472               | -2.203771 | 0.012034  |
| 22            | 1             | 0           | -3.607606               | 2.036246  | 0.150783  |
| 23            | 1             | 0           | -4.615557               | -0.210613 | 0.290951  |
| 24            | 6             | 0           | 1.347608                | -0.115514 | 1.518256  |
| 25            | 1             | 0           | 2.183332                | -0.137981 | 2.212863  |
| 26            | 1             | 0           | 0.409960                | -0.105456 | 2.069649  |

Isoxazolidine **35** (Toluene)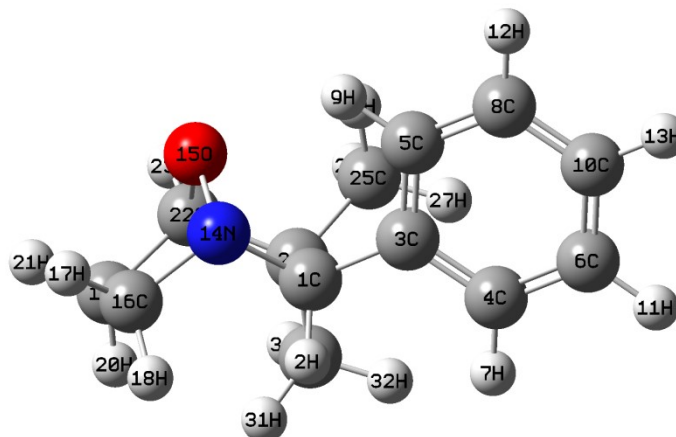

| Center Number | Atomic Number | Atomic Type | Coordinates (Angstroms) |           |           |
|---------------|---------------|-------------|-------------------------|-----------|-----------|
|               |               |             | X                       | Y         | Z         |
| 1             | 6             | 0           | -0.341579               | -0.017139 | -0.610971 |
| 2             | 1             | 0           | -0.500632               | 0.314225  | -1.634958 |
| 3             | 6             | 0           | 1.134399                | -0.124926 | -0.385057 |
| 4             | 6             | 0           | 1.979011                | 0.809851  | -0.961006 |
| 5             | 6             | 0           | 1.676303                | -1.113296 | 0.419269  |
| 6             | 6             | 0           | 3.340980                | 0.766270  | -0.734089 |
| 7             | 1             | 0           | 1.565846                | 1.577918  | -1.600015 |
| 8             | 6             | 0           | 3.038293                | -1.161147 | 0.642549  |
| 9             | 1             | 0           | 1.023217                | -1.846678 | 0.864233  |
| 10            | 6             | 0           | 3.874914                | -0.221541 | 0.070512  |
| 11            | 1             | 0           | 3.986231                | 1.499360  | -1.193252 |
| 12            | 1             | 0           | 3.449570                | -1.938767 | 1.267809  |
| 13            | 1             | 0           | 4.938650                | -0.262518 | 0.246123  |
| 14            | 7             | 0           | -1.028960               | -1.307520 | -0.444450 |
| 15            | 8             | 0           | -1.484413               | -1.225883 | 0.894088  |
| 16            | 6             | 0           | -2.302679               | -1.264396 | -1.165026 |
| 17            | 1             | 0           | -2.712882               | -2.267338 | -1.183975 |
| 18            | 1             | 0           | -2.133423               | -0.941607 | -2.186414 |
| 19            | 6             | 0           | -3.177121               | -0.311524 | -0.335892 |
| 20            | 1             | 0           | -3.504038               | 0.567082  | -0.878795 |
| 21            | 1             | 0           | -4.055023               | -0.817655 | 0.050234  |
| 22            | 6             | 0           | -2.206299               | -0.002802 | 0.786071  |
| 23            | 1             | 0           | -2.655827               | 0.231523  | 1.744361  |
| 24            | 6             | 0           | -1.088773               | 0.950899  | 0.366866  |
| 25            | 6             | 0           | -0.274243               | 1.296912  | 1.600560  |
| 26            | 1             | 0           | -0.857840               | 1.940100  | 2.255668  |
| 27            | 1             | 0           | 0.640246                | 1.819737  | 1.336229  |
| 28            | 1             | 0           | -0.000663               | 0.399703  | 2.146732  |
| 29            | 6             | 0           | -1.525020               | 2.225627  | -0.323845 |
| 30            | 1             | 0           | -2.168597               | 2.821138  | 0.319986  |
| 31            | 1             | 0           | -2.053393               | 2.036027  | -1.253972 |
| 32            | 1             | 0           | -0.652539               | 2.830732  | -0.561189 |

## Isoxazolidine 36 (Toluene)

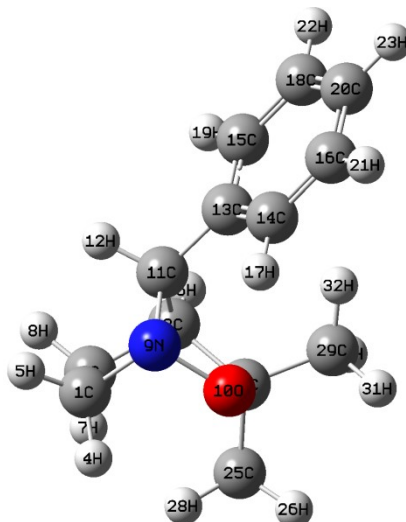

| Center Number | Atomic Number | Atomic Type | Coordinates (Angstroms) |           |           |
|---------------|---------------|-------------|-------------------------|-----------|-----------|
|               |               |             | X                       | Y         | Z         |
| 1             | 6             | 0           | -2.283485               | -1.558114 | -0.570967 |
| 2             | 6             | 0           | -1.252652               | -0.184221 | 1.030020  |
| 3             | 6             | 0           | -2.439151               | -1.127874 | 0.903178  |
| 4             | 1             | 0           | -3.050833               | -1.161870 | -1.225326 |
| 5             | 1             | 0           | -2.251560               | -2.636448 | -0.690465 |
| 6             | 1             | 0           | -0.981950               | 0.102386  | 2.039776  |
| 7             | 1             | 0           | -3.394833               | -0.667819 | 1.121399  |
| 8             | 1             | 0           | -2.319296               | -1.973549 | 1.574964  |
| 9             | 7             | 0           | -0.993569               | -1.008557 | -1.007287 |
| 10            | 8             | 0           | -1.204405               | 0.379922  | -1.204358 |
| 11            | 6             | 0           | -0.230267               | -1.012256 | 0.234178  |
| 12            | 1             | 0           | -0.221684               | -2.034702 | 0.613207  |
| 13            | 6             | 0           | 1.183483                | -0.545484 | 0.100451  |
| 14            | 6             | 0           | 1.733163                | -0.239128 | -1.131797 |
| 15            | 6             | 0           | 1.975641                | -0.452068 | 1.234356  |
| 16            | 6             | 0           | 3.049803                | 0.169564  | -1.224194 |
| 17            | 1             | 0           | 1.116043                | -0.310943 | -2.011697 |
| 18            | 6             | 0           | 3.290221                | -0.041526 | 1.142382  |
| 19            | 1             | 0           | 1.557798                | -0.698252 | 2.200169  |
| 20            | 6             | 0           | 3.831215                | 0.274104  | -0.089825 |
| 21            | 1             | 0           | 3.466477                | 0.410833  | -2.190064 |
| 22            | 1             | 0           | 3.894253                | 0.030382  | 2.033764  |
| 23            | 1             | 0           | 4.858078                | 0.596708  | -0.164787 |
| 24            | 6             | 0           | -1.462279               | 0.998991  | 0.081268  |
| 25            | 6             | 0           | -2.865628               | 1.570413  | 0.053036  |
| 26            | 1             | 0           | -2.888668               | 2.424664  | -0.617323 |
| 27            | 1             | 0           | -3.169420               | 1.908981  | 1.040669  |
| 28            | 1             | 0           | -3.588575               | 0.848967  | -0.309732 |
| 29            | 6             | 0           | -0.479832               | 2.130971  | 0.284776  |
| 30            | 1             | 0           | -0.748100               | 2.698898  | 1.172472  |
| 31            | 1             | 0           | -0.527673               | 2.799669  | -0.570355 |
| 32            | 1             | 0           | 0.538781                | 1.782387  | 0.388036  |

## Isoxazolidine 21 (Toluene)

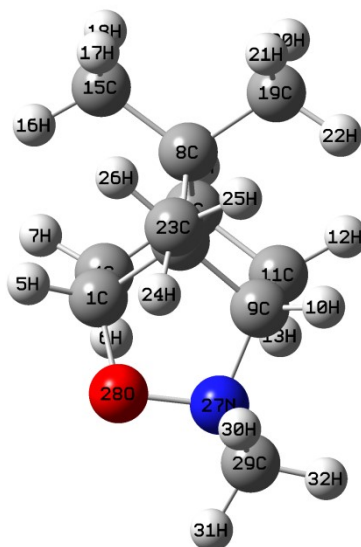

| Center Number | Atomic Number | Atomic Type | Coordinates (Angstroms) |           |           |
|---------------|---------------|-------------|-------------------------|-----------|-----------|
|               |               |             | X                       | Y         | Z         |
| 1             | 6             | 0           | -0.348102               | -0.423543 | -1.245548 |
| 2             | 6             | 0           | 0.147610                | 0.613365  | -0.245106 |
| 3             | 6             | 0           | 1.088496                | -1.298323 | 0.475406  |
| 4             | 6             | 0           | 0.346601                | -1.720863 | -0.792129 |
| 5             | 1             | 0           | -0.161574               | -0.175090 | -2.285744 |
| 6             | 1             | 0           | -0.397479               | -2.488215 | -0.598860 |
| 7             | 1             | 0           | 1.021585                | -2.095582 | -1.554934 |
| 8             | 6             | 0           | 1.551541                | 0.127235  | 0.129588  |
| 9             | 6             | 0           | -0.751153               | 0.135377  | 0.912772  |
| 10            | 1             | 0           | -0.979515               | 0.916162  | 1.633034  |
| 11            | 6             | 0           | 0.024089                | -1.038026 | 1.527246  |
| 12            | 1             | 0           | 0.459231                | -0.779607 | 2.487260  |
| 13            | 1             | 0           | -0.641142               | -1.882873 | 1.671798  |
| 14            | 1             | 0           | 1.875248                | -1.980662 | 0.784719  |
| 15            | 6             | 0           | 2.529836                | 0.183935  | -1.030332 |
| 16            | 1             | 0           | 2.152418                | -0.293754 | -1.928868 |
| 17            | 1             | 0           | 2.767027                | 1.215339  | -1.280715 |
| 18            | 1             | 0           | 3.462463                | -0.306202 | -0.759628 |
| 19            | 6             | 0           | 2.150860                | 0.897290  | 1.292200  |
| 20            | 1             | 0           | 3.034549                | 0.391033  | 1.674862  |
| 21            | 1             | 0           | 2.457460                | 1.888214  | 0.964648  |
| 22            | 1             | 0           | 1.456348                | 1.030427  | 2.115372  |
| 23            | 6             | 0           | -0.015845               | 2.046404  | -0.669252 |
| 24            | 1             | 0           | -1.023796               | 2.229822  | -1.029881 |
| 25            | 1             | 0           | 0.177597                | 2.727297  | 0.156372  |
| 26            | 1             | 0           | 0.671453                | 2.292065  | -1.476016 |
| 27            | 7             | 0           | -2.000238               | -0.333861 | 0.304365  |
| 28            | 8             | 0           | -1.740070               | -0.437193 | -1.099583 |
| 29            | 6             | 0           | -3.095739               | 0.593205  | 0.426929  |
| 30            | 1             | 0           | -2.857054               | 1.597643  | 0.070454  |
| 31            | 1             | 0           | -3.936888               | 0.210975  | -0.140409 |
| 32            | 1             | 0           | -3.384863               | 0.641258  | 1.472006  |



Isoxazolidine **22** (Toluene)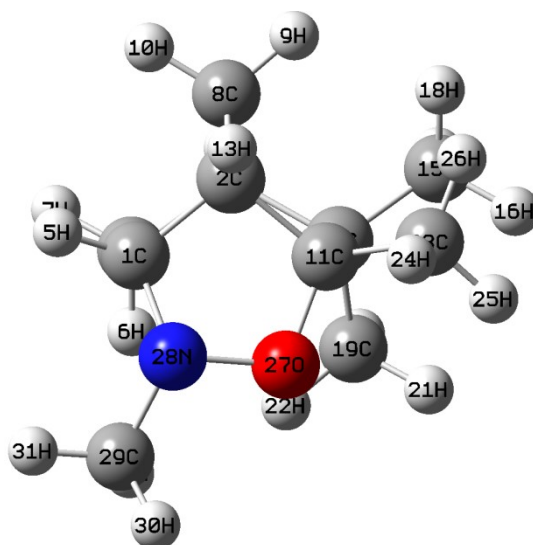

| Center Number | Atomic Number | Atomic Type | Coordinates (Angstroms) |           |           |
|---------------|---------------|-------------|-------------------------|-----------|-----------|
|               |               |             | X                       | Y         | Z         |
| 1             | 6             | 0           | 1.350556                | 0.873074  | -0.560796 |
| 2             | 6             | 0           | 0.107914                | 0.539440  | -1.368305 |
| 3             | 6             | 0           | -0.759572               | 1.416701  | 0.492417  |
| 4             | 6             | 0           | 0.748842                | 1.561778  | 0.686750  |
| 5             | 1             | 0           | 2.061641                | 1.503550  | -1.086044 |
| 6             | 1             | 0           | 1.108032                | 1.142561  | 1.619163  |
| 7             | 1             | 0           | 1.015034                | 2.615514  | 0.687782  |
| 8             | 6             | 0           | -0.861018               | 1.646543  | -1.010860 |
| 9             | 1             | 0           | -1.854214               | 1.515877  | -1.423464 |
| 10            | 1             | 0           | -0.490872               | 2.623352  | -1.313561 |
| 11            | 6             | 0           | -0.344688               | -0.686152 | -0.553888 |
| 12            | 6             | 0           | -1.175717               | -0.056000 | 0.613742  |
| 13            | 1             | 0           | 0.295519                | 0.333833  | -2.416037 |
| 14            | 1             | 0           | -1.346814               | 2.077374  | 1.124634  |
| 15            | 6             | 0           | -2.679271               | -0.197406 | 0.407260  |
| 16            | 1             | 0           | -2.980906               | -1.238240 | 0.490297  |
| 17            | 1             | 0           | -3.204179               | 0.358645  | 1.180747  |
| 18            | 1             | 0           | -3.026424               | 0.166831  | -0.553203 |
| 19            | 6             | 0           | -0.857134               | -0.681694 | 1.957968  |
| 20            | 1             | 0           | -1.438821               | -0.195203 | 2.738518  |
| 21            | 1             | 0           | -1.122525               | -1.736773 | 1.954072  |
| 22            | 1             | 0           | 0.193264                | -0.619573 | 2.211594  |
| 23            | 6             | 0           | -1.043903               | -1.758052 | -1.346521 |
| 24            | 1             | 0           | -0.357550               | -2.152513 | -2.088852 |
| 25            | 1             | 0           | -1.352315               | -2.574887 | -0.699020 |
| 26            | 1             | 0           | -1.923819               | -1.370802 | -1.850917 |
| 27            | 8             | 0           | 0.845055                | -1.261291 | -0.029145 |
| 28            | 7             | 0           | 1.945836                | -0.431651 | -0.398618 |
| 29            | 6             | 0           | 2.924150                | -0.572961 | 0.641290  |
| 30            | 1             | 0           | 3.291050                | -1.593579 | 0.640674  |
| 31            | 1             | 0           | 3.753736                | 0.090134  | 0.415698  |
| 32            | 1             | 0           | 2.537922                | -0.345822 | 1.637056  |

Isoxazolidine **25** (Toluene)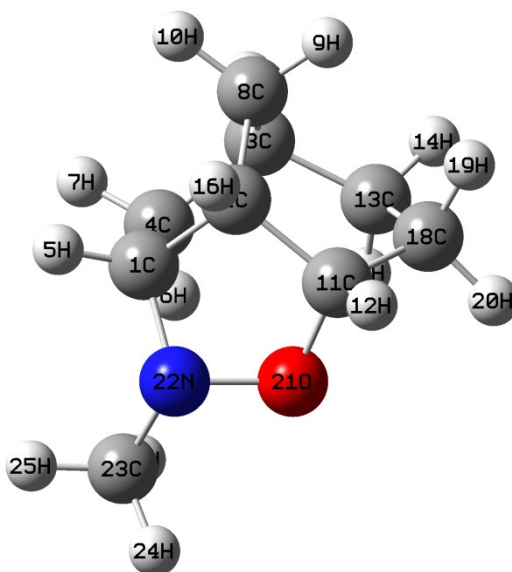

| Center Number | Atomic Number | Atomic Type | Coordinates (Angstroms) |           |           |
|---------------|---------------|-------------|-------------------------|-----------|-----------|
|               |               |             | X                       | Y         | Z         |
| 1             | 6             | 0           | 0.795549                | -0.904207 | 0.551465  |
| 2             | 6             | 0           | -0.330918               | -0.216104 | 1.308969  |
| 3             | 6             | 0           | -1.362192               | -0.989797 | -0.633207 |
| 4             | 6             | 0           | 0.104390                | -1.425830 | -0.723757 |
| 5             | 1             | 0           | 1.278334                | -1.693592 | 1.119788  |
| 6             | 1             | 0           | 0.576280                | -1.047938 | -1.625796 |
| 7             | 1             | 0           | 0.165658                | -2.510641 | -0.754401 |
| 8             | 6             | 0           | -1.582392               | -0.950046 | 0.872335  |
| 9             | 1             | 0           | -2.506083               | -0.458598 | 1.166194  |
| 10            | 1             | 0           | -1.593188               | -1.952988 | 1.294715  |
| 11            | 6             | 0           | -0.245172               | 1.202182  | 0.698204  |
| 12            | 1             | 0           | -0.123581               | 1.949874  | 1.480945  |
| 13            | 6             | 0           | -1.614015               | 0.404795  | -1.221373 |
| 14            | 1             | 0           | -2.625990               | 0.459814  | -1.616515 |
| 15            | 1             | 0           | -0.939523               | 0.567042  | -2.058157 |
| 16            | 1             | 0           | -0.168627               | -0.192143 | 2.380707  |
| 17            | 1             | 0           | -2.004645               | -1.710562 | -1.131584 |
| 18            | 6             | 0           | -1.421593               | 1.508985  | -0.190404 |
| 19            | 1             | 0           | -2.305838               | 1.606615  | 0.436516  |
| 20            | 1             | 0           | -1.274890               | 2.470153  | -0.676080 |
| 21            | 8             | 0           | 0.903490                | 1.204109  | -0.132556 |
| 22            | 7             | 0           | 1.738857                | 0.183727  | 0.392892  |
| 23            | 6             | 0           | 2.798845                | -0.005410 | -0.554127 |
| 24            | 1             | 0           | 3.412523                | 0.888584  | -0.573925 |
| 25            | 1             | 0           | 3.409891                | -0.835498 | -0.214105 |
| 26            | 1             | 0           | 2.444759                | -0.206501 | -1.566721 |

## Isoxazolidine 27 (Toluene)

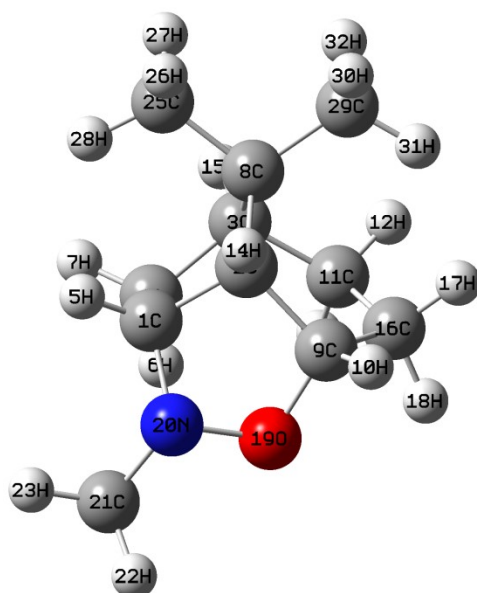

| Center Number | Atomic Number | Atomic Type | Coordinates (Angstroms) |           |           |
|---------------|---------------|-------------|-------------------------|-----------|-----------|
|               |               |             | X                       | Y         | Z         |
| 1             | 6             | 0           | -0.833863               | -1.055473 | -0.181112 |
| 2             | 6             | 0           | 0.218985                | -0.309742 | -0.988045 |
| 3             | 6             | 0           | 0.964550                | -0.075259 | 1.192630  |
| 4             | 6             | 0           | -0.378490               | -0.818750 | 1.274473  |
| 5             | 1             | 0           | -0.920409               | -2.105991 | -0.438795 |
| 6             | 1             | 0           | -1.111206               | -0.227310 | 1.814685  |
| 7             | 1             | 0           | -0.269959               | -1.760690 | 1.803442  |
| 8             | 6             | 0           | 1.500950                | -0.495167 | -0.178863 |
| 9             | 6             | 0           | -0.390092               | 1.114213  | -0.942848 |
| 10            | 1             | 0           | -0.477659               | 1.516019  | -1.951432 |
| 11            | 6             | 0           | 0.802271                | 1.443824  | 1.270159  |
| 12            | 1             | 0           | 1.756137                | 1.888507  | 1.547073  |
| 13            | 1             | 0           | 0.113629                | 1.674780  | 2.079049  |
| 14            | 1             | 0           | 0.297039                | -0.664640 | -2.011711 |
| 15            | 1             | 0           | 1.629442                | -0.392921 | 1.994601  |
| 16            | 6             | 0           | 0.316448                | 2.087714  | -0.032109 |
| 17            | 1             | 0           | 1.137111                | 2.548355  | -0.572082 |
| 18            | 1             | 0           | -0.384499               | 2.890635  | 0.180434  |
| 19            | 8             | 0           | -1.691879               | 0.969340  | -0.391686 |
| 20            | 7             | 0           | -2.046604               | -0.387222 | -0.596592 |
| 21            | 6             | 0           | -3.219882               | -0.625402 | 0.193729  |
| 22            | 1             | 0           | -4.037023               | -0.037350 | -0.209433 |
| 23            | 1             | 0           | -3.476147               | -1.676474 | 0.107306  |
| 24            | 1             | 0           | -3.092219               | -0.368036 | 1.246945  |
| 25            | 6             | 0           | 1.889142                | -1.969437 | -0.172612 |
| 26            | 1             | 0           | 2.108261                | -2.310239 | -1.182546 |
| 27            | 1             | 0           | 2.783892                | -2.114968 | 0.428616  |
| 28            | 1             | 0           | 1.113711                | -2.610771 | 0.233280  |
| 29            | 6             | 0           | 2.720264                | 0.266049  | -0.665698 |
| 30            | 1             | 0           | 3.003458                | -0.079194 | -1.657862 |
| 31            | 1             | 0           | 2.583737                | 1.337150  | -0.716346 |
| 32            | 1             | 0           | 3.562261                | 0.073543  | -0.003814 |

TS1 (Toluene)

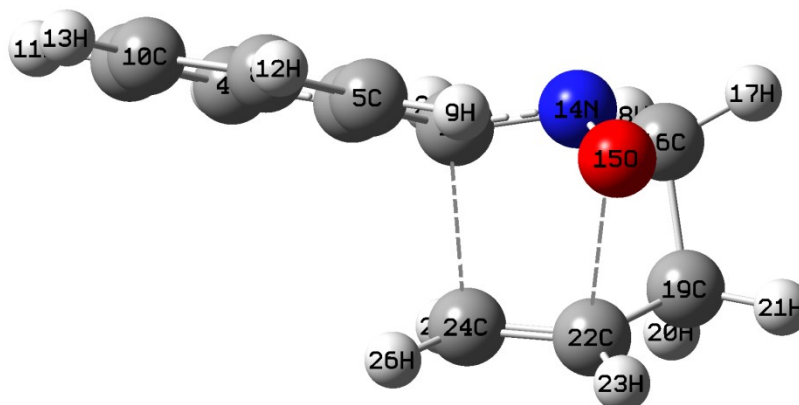

| Center Number | Atomic Number | Atomic Type | Coordinates (Angstroms) |           |           |
|---------------|---------------|-------------|-------------------------|-----------|-----------|
|               |               |             | X                       | Y         | Z         |
| 1             | 6             | 0           | 0.416613                | -0.591607 | -0.536534 |
| 2             | 1             | 0           | 0.548305                | -1.579747 | -0.954220 |
| 3             | 6             | 0           | -0.978104               | -0.231265 | -0.274042 |
| 4             | 6             | 0           | -1.904963               | -1.268113 | -0.281543 |
| 5             | 6             | 0           | -1.422372               | 1.063934  | -0.029160 |
| 6             | 6             | 0           | -3.241708               | -1.026651 | -0.047236 |
| 7             | 1             | 0           | -1.569672               | -2.275960 | -0.479319 |
| 8             | 6             | 0           | -2.764337               | 1.300932  | 0.189824  |
| 9             | 1             | 0           | -0.709089               | 1.867599  | -0.016625 |
| 10            | 6             | 0           | -3.677226               | 0.263382  | 0.188078  |
| 11            | 1             | 0           | -3.944765               | -1.844960 | -0.056976 |
| 12            | 1             | 0           | -3.099347               | 2.310818  | 0.369809  |
| 13            | 1             | 0           | -4.722953               | 0.458913  | 0.367586  |
| 14            | 7             | 0           | 1.342652                | 0.283619  | -0.952669 |
| 15            | 8             | 0           | 1.412932                | 1.385041  | -0.288271 |
| 16            | 6             | 0           | 2.670444                | -0.240268 | -1.104378 |
| 17            | 1             | 0           | 3.223567                | 0.413267  | -1.766355 |
| 18            | 1             | 0           | 2.642204                | -1.241910 | -1.519560 |
| 19            | 6             | 0           | 3.300273                | -0.181777 | 0.338339  |
| 20            | 1             | 0           | 3.724887                | -1.158091 | 0.557877  |
| 21            | 1             | 0           | 4.095391                | 0.552845  | 0.356319  |
| 22            | 6             | 0           | 2.220856                | 0.152910  | 1.294748  |
| 23            | 1             | 0           | 2.274379                | 1.039318  | 1.900674  |
| 24            | 6             | 0           | 1.214404                | -0.773488 | 1.415119  |
| 25            | 1             | 0           | 1.439457                | -1.809214 | 1.204453  |
| 26            | 1             | 0           | 0.392337                | -0.606478 | 2.091898  |

TS2 (Toluene)

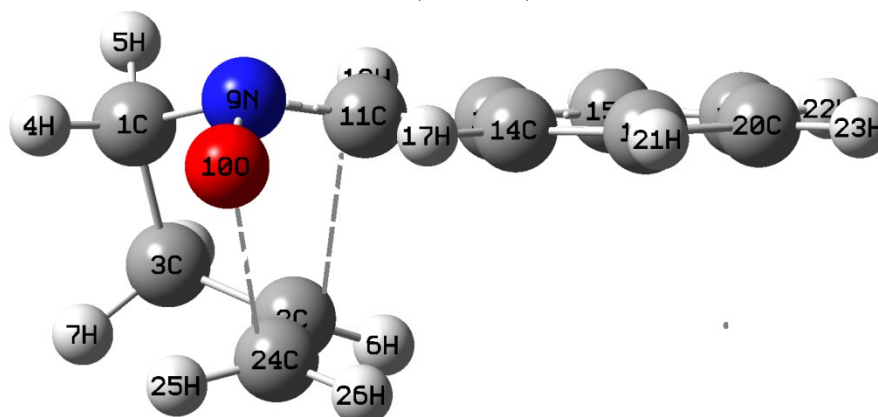

| Center<br>Number | Atomic<br>Number | Atomic<br>Type | Coordinates (Angstroms) |           |           |
|------------------|------------------|----------------|-------------------------|-----------|-----------|
|                  |                  |                | X                       | Y         | Z         |
| 1                | 6                | 0              | -2.759073               | -0.283907 | -0.948797 |
| 2                | 6                | 0              | -1.627157               | -0.508520 | 1.223871  |
| 3                | 6                | 0              | -2.879697               | -0.879317 | 0.490761  |
| 4                | 1                | 0              | -3.471791               | 0.505144  | -1.143657 |
| 5                | 1                | 0              | -2.853332               | -1.050498 | -1.711018 |
| 6                | 1                | 0              | -0.998331               | -1.257375 | 1.676745  |
| 7                | 1                | 0              | -3.757583               | -0.469533 | 0.983076  |
| 8                | 1                | 0              | -3.006133               | -1.955991 | 0.433176  |
| 9                | 7                | 0              | -1.436400               | 0.315189  | -1.011824 |
| 10               | 8                | 0              | -1.398946               | 1.478390  | -0.453667 |
| 11               | 6                | 0              | -0.511943               | -0.553671 | -0.591900 |
| 12               | 1                | 0              | -0.705682               | -1.571311 | -0.903432 |
| 13               | 6                | 0              | 0.887923                | -0.249106 | -0.330748 |
| 14               | 6                | 0              | 1.425878                | 1.031982  | -0.250617 |
| 15               | 6                | 0              | 1.734053                | -1.339707 | -0.147149 |
| 16               | 6                | 0              | 2.772928                | 1.200372  | 0.001551  |
| 17               | 1                | 0              | 0.784101                | 1.880568  | -0.394536 |
| 18               | 6                | 0              | 3.073964                | -1.165169 | 0.119494  |
| 19               | 1                | 0              | 1.329072                | -2.338841 | -0.217963 |
| 20               | 6                | 0              | 3.600351                | 0.110854  | 0.194210  |
| 21               | 1                | 0              | 3.178426                | 2.199201  | 0.051642  |
| 22               | 1                | 0              | 3.710302                | -2.024652 | 0.261662  |
| 23               | 1                | 0              | 4.649861                | 0.255314  | 0.398172  |
| 24               | 6                | 0              | -1.493404               | 0.824470  | 1.524706  |
| 25               | 1                | 0              | -2.354480               | 1.469373  | 1.561469  |
| 26               | 1                | 0              | -0.601012               | 1.195466  | 2.004484  |

## TS3 (Toluene)

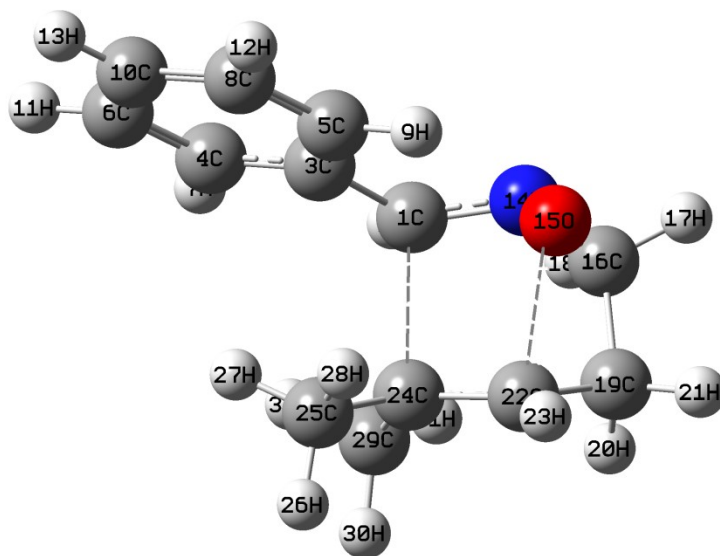

| Center Number | Atomic Number | Atomic Type | Coordinates (Angstroms) |           |           |
|---------------|---------------|-------------|-------------------------|-----------|-----------|
|               |               |             | X                       | Y         | Z         |
| 1             | 6             | 0           | -0.298378               | -0.250335 | -0.867809 |
| 2             | 1             | 0           | -0.483132               | 0.242334  | -1.812209 |
| 3             | 6             | 0           | 1.106156                | -0.269143 | -0.471447 |
| 4             | 6             | 0           | 1.958560                | 0.607052  | -1.137010 |
| 5             | 6             | 0           | 1.631343                | -1.080399 | 0.529850  |
| 6             | 6             | 0           | 3.297484                | 0.678671  | -0.814696 |
| 7             | 1             | 0           | 1.563743                | 1.232089  | -1.925022 |
| 8             | 6             | 0           | 2.975194                | -1.016754 | 0.835759  |
| 9             | 1             | 0           | 0.976338                | -1.751327 | 1.054376  |
| 10            | 6             | 0           | 3.811772                | -0.137253 | 0.174687  |
| 11            | 1             | 0           | 3.940973                | 1.364792  | -1.343099 |
| 12            | 1             | 0           | 3.372261                | -1.658191 | 1.607414  |
| 13            | 1             | 0           | 4.859458                | -0.089015 | 0.427779  |
| 14            | 7             | 0           | -1.147369               | -1.264990 | -0.626617 |
| 15            | 8             | 0           | -1.174128               | -1.659956 | 0.604317  |
| 16            | 6             | 0           | -2.502563               | -1.051176 | -1.057449 |
| 17            | 1             | 0           | -2.985589               | -2.011892 | -1.183806 |
| 18            | 1             | 0           | -2.520252               | -0.510304 | -1.998500 |
| 19            | 6             | 0           | -3.180456               | -0.275058 | 0.125645  |
| 20            | 1             | 0           | -3.760863               | 0.545400  | -0.288139 |
| 21            | 1             | 0           | -3.855741               | -0.938142 | 0.651267  |
| 22            | 6             | 0           | -2.102786               | 0.191362  | 1.024888  |
| 23            | 1             | 0           | -2.115312               | -0.088608 | 2.064208  |
| 24            | 6             | 0           | -1.176575               | 1.107300  | 0.545742  |
| 25            | 6             | 0           | -0.136904               | 1.601280  | 1.505796  |
| 26            | 1             | 0           | -0.521038               | 2.444312  | 2.080057  |
| 27            | 1             | 0           | 0.754672                | 1.941192  | 0.984930  |
| 28            | 1             | 0           | 0.161591                | 0.817633  | 2.194853  |
| 29            | 6             | 0           | -1.554292               | 2.124652  | -0.503061 |
| 30            | 1             | 0           | -2.038829               | 2.982485  | -0.036647 |
| 31            | 1             | 0           | -2.226887               | 1.731497  | -1.259023 |
| 32            | 1             | 0           | -0.668103               | 2.499129  | -1.012024 |

## TS4 (Toluene)

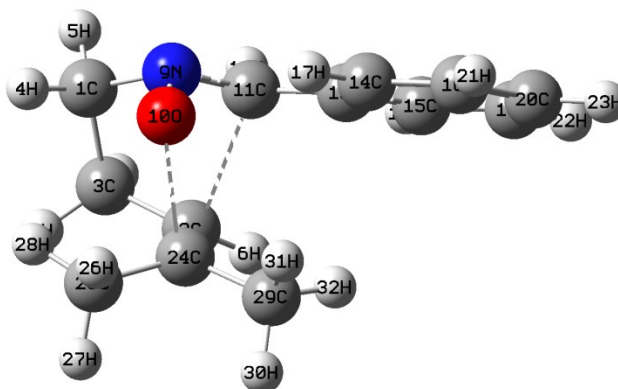

| Center Number | Atomic Number | Atomic Type | Coordinates (Angstroms) |           |           |
|---------------|---------------|-------------|-------------------------|-----------|-----------|
|               |               |             | X                       | Y         | Z         |
| 1             | 6             | 0           | 2.329337                | -1.535367 | 0.661628  |
| 2             | 6             | 0           | 1.449841                | -0.153458 | -1.166590 |
| 3             | 6             | 0           | 2.519102                | -1.145466 | -0.837459 |
| 4             | 1             | 0           | 3.083240                | -1.109392 | 1.310379  |
| 5             | 1             | 0           | 2.305520                | -2.611862 | 0.796289  |
| 6             | 1             | 0           | 0.802601                | -0.307749 | -2.015595 |
| 7             | 1             | 0           | 3.520420                | -0.754261 | -0.994117 |
| 8             | 1             | 0           | 2.418138                | -2.030051 | -1.459268 |
| 9             | 7             | 0           | 1.060999                | -0.948892 | 1.061171  |
| 10            | 8             | 0           | 1.180277                | 0.300187  | 1.382447  |
| 11            | 6             | 0           | 0.122562                | -1.202590 | 0.145375  |
| 12            | 1             | 0           | 0.196932                | -2.188099 | -0.295779 |
| 13            | 6             | 0           | -1.212291               | -0.620682 | 0.138134  |
| 14            | 6             | 0           | -1.660216               | 0.324729  | 1.054764  |
| 15            | 6             | 0           | -2.090115               | -1.067922 | -0.845089 |
| 16            | 6             | 0           | -2.952352               | 0.803914  | 0.976418  |
| 17            | 1             | 0           | -0.986068               | 0.677402  | 1.814116  |
| 18            | 6             | 0           | -3.372774               | -0.572534 | -0.929855 |
| 19            | 1             | 0           | -1.756130               | -1.814081 | -1.551664 |
| 20            | 6             | 0           | -3.809592               | 0.368611  | -0.016263 |
| 21            | 1             | 0           | -3.290361               | 1.531654  | 1.698030  |
| 22            | 1             | 0           | -4.036026               | -0.927198 | -1.703394 |
| 23            | 1             | 0           | -4.814543               | 0.756736  | -0.074738 |
| 24            | 6             | 0           | 1.499973                | 1.090386  | -0.560328 |
| 25            | 6             | 0           | 2.766637                | 1.702176  | -0.051355 |
| 26            | 1             | 0           | 2.558241                | 2.367351  | 0.780509  |
| 27            | 1             | 0           | 3.227451                | 2.293024  | -0.844717 |
| 28            | 1             | 0           | 3.481627                | 0.963953  | 0.289906  |
| 29            | 6             | 0           | 0.411764                | 2.072945  | -0.831056 |
| 30            | 1             | 0           | 0.793156                | 2.907215  | -1.419334 |
| 31            | 1             | 0           | 0.038517                | 2.476858  | 0.107212  |
| 32            | 1             | 0           | -0.423183               | 1.620788  | -1.355555 |

## TS5 (Toluene)

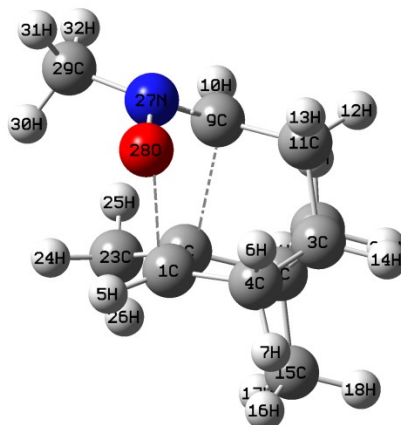

| Center Number | Atomic Number | Atomic Type | Coordinates (Angstroms) |           |           |
|---------------|---------------|-------------|-------------------------|-----------|-----------|
|               |               |             | X                       | Y         | Z         |
| 1             | 6             | 0           | -0.140443               | -0.374559 | -1.381732 |
| 2             | 6             | 0           | 0.285179                | 0.639051  | -0.536011 |
| 3             | 6             | 0           | 1.065565                | -1.292397 | 0.387524  |
| 4             | 6             | 0           | 0.539450                | -1.651221 | -1.000752 |
| 5             | 1             | 0           | -0.613171               | -0.219076 | -2.335930 |
| 6             | 1             | 0           | -0.154853               | -2.485896 | -0.985452 |
| 7             | 1             | 0           | 1.352542                | -1.902512 | -1.681549 |
| 8             | 6             | 0           | 1.537179                | 0.149663  | 0.194462  |
| 9             | 6             | 0           | -0.943891               | 0.016290  | 1.041301  |
| 10            | 1             | 0           | -0.978048               | 0.819403  | 1.763672  |
| 11            | 6             | 0           | -0.115593               | -1.203425 | 1.349849  |
| 12            | 1             | 0           | 0.234364                | -1.147431 | 2.377109  |
| 13            | 1             | 0           | -0.751855               | -2.079386 | 1.256413  |
| 14            | 1             | 0           | 1.834232                | -1.971642 | 0.748968  |
| 15            | 6             | 0           | 2.763603                | 0.251415  | -0.705294 |
| 16            | 1             | 0           | 2.611261                | -0.226051 | -1.666922 |
| 17            | 1             | 0           | 3.008067                | 1.294971  | -0.892393 |
| 18            | 1             | 0           | 3.629192                | -0.202966 | -0.226824 |
| 19            | 6             | 0           | 1.863640                | 0.900654  | 1.472609  |
| 20            | 1             | 0           | 2.748476                | 0.477845  | 1.943498  |
| 21            | 1             | 0           | 2.083594                | 1.941605  | 1.243698  |
| 22            | 1             | 0           | 1.063552                | 0.889336  | 2.203383  |
| 23            | 6             | 0           | 0.096038                | 2.096130  | -0.814429 |
| 24            | 1             | 0           | -0.662557               | 2.260599  | -1.574213 |
| 25            | 1             | 0           | -0.193084               | 2.656658  | 0.072335  |
| 26            | 1             | 0           | 1.022460                | 2.539605  | -1.180273 |
| 27            | 7             | 0           | -2.071939               | -0.158164 | 0.362506  |
| 28            | 8             | 0           | -1.973932               | -0.987115 | -0.612689 |
| 29            | 6             | 0           | -2.993275               | 0.930204  | 0.159133  |
| 30            | 1             | 0           | -2.702068               | 1.484631  | -0.731150 |
| 31            | 1             | 0           | -3.983683               | 0.519054  | 0.006555  |
| 32            | 1             | 0           | -2.998111               | 1.584481  | 1.023090  |



## TS6 (Toluene)

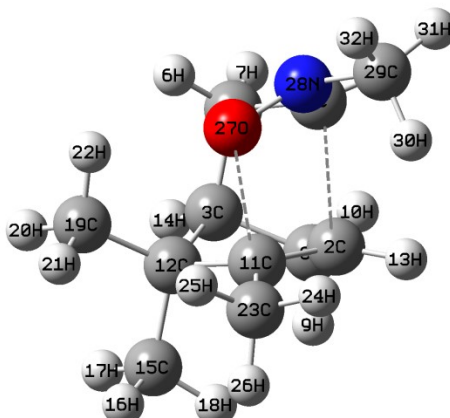

| Center Number | Atomic Number | Atomic Type | Coordinates (Angstroms) |           |           |
|---------------|---------------|-------------|-------------------------|-----------|-----------|
|               |               |             | X                       | Y         | Z         |
| 1             | 6             | 0           | -1.428489               | -1.124355 | 0.057997  |
| 2             | 6             | 0           | -0.171220               | -0.245782 | -1.377797 |
| 3             | 6             | 0           | 1.044311                | -1.377262 | 0.163486  |
| 4             | 6             | 0           | -0.282311               | -1.693269 | 0.853429  |
| 5             | 1             | 0           | -2.077712               | -1.798203 | -0.483314 |
| 6             | 1             | 0           | -0.331616               | -1.290146 | 1.859557  |
| 7             | 1             | 0           | -0.398686               | -2.772326 | 0.916324  |
| 8             | 6             | 0           | 0.683557                | -1.485905 | -1.307671 |
| 9             | 1             | 0           | 1.547270                | -1.439617 | -1.967235 |
| 10            | 1             | 0           | 0.145502                | -2.404044 | -1.535970 |
| 11            | 6             | 0           | 0.333758                | 0.736013  | -0.541884 |
| 12            | 6             | 0           | 1.430878                | 0.106044  | 0.297554  |
| 13            | 1             | 0           | -0.774913               | -0.006032 | -2.242194 |
| 14            | 1             | 0           | 1.839903                | -2.039139 | 0.498292  |
| 15            | 6             | 0           | 2.775392                | 0.361907  | -0.387697 |
| 16            | 1             | 0           | 3.054398                | 1.406903  | -0.278388 |
| 17            | 1             | 0           | 3.555576                | -0.238157 | 0.076081  |
| 18            | 1             | 0           | 2.755927                | 0.137542  | -1.449659 |
| 19            | 6             | 0           | 1.549436                | 0.604241  | 1.724551  |
| 20            | 1             | 0           | 2.365848                | 0.088814  | 2.227846  |
| 21            | 1             | 0           | 1.783530                | 1.666758  | 1.731960  |
| 22            | 1             | 0           | 0.634801                | 0.468714  | 2.283789  |
| 23            | 6             | 0           | 0.288394                | 2.200605  | -0.791326 |
| 24            | 1             | 0           | -0.602182               | 2.472157  | -1.349063 |
| 25            | 1             | 0           | 0.286257                | 2.760580  | 0.137879  |
| 26            | 1             | 0           | 1.156425                | 2.512096  | -1.374357 |
| 27            | 8             | 0           | -1.166550               | 0.848416  | 0.968367  |
| 28            | 7             | 0           | -1.995285               | -0.012368 | 0.491756  |
| 29            | 6             | 0           | -3.127752               | 0.537834  | -0.207724 |
| 30            | 1             | 0           | -2.777386               | 1.066191  | -1.094324 |
| 31            | 1             | 0           | -3.812709               | -0.252254 | -0.492889 |
| 32            | 1             | 0           | -3.626569               | 1.238984  | 0.448929  |

## TS7 (Toluene)

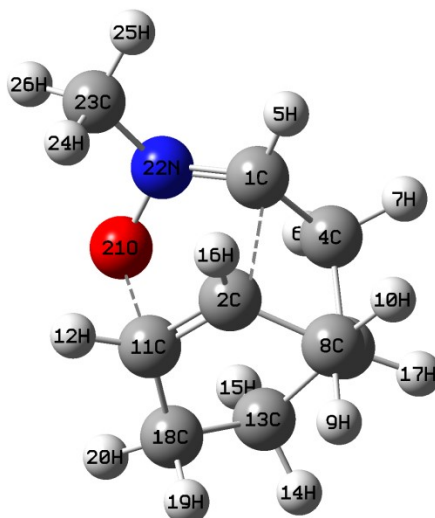

| Center Number | Atomic Number | Atomic Type | Coordinates (Angstroms) |           |           |
|---------------|---------------|-------------|-------------------------|-----------|-----------|
|               |               |             | X                       | Y         | Z         |
| 1             | 6             | 0           | -0.928218               | 1.121596  | 0.026791  |
| 2             | 6             | 0           | 0.192489                | -0.083425 | 1.387877  |
| 3             | 6             | 0           | 1.576686                | 0.923389  | -0.287202 |
| 4             | 6             | 0           | 0.271146                | 1.567291  | -0.754551 |
| 5             | 1             | 0           | -1.461728               | 1.856626  | 0.612245  |
| 6             | 1             | 0           | 0.089563                | 1.343743  | -1.803305 |
| 7             | 1             | 0           | 0.351336                | 2.647105  | -0.652409 |
| 8             | 6             | 0           | 1.421469                | 0.759841  | 1.216347  |
| 9             | 1             | 0           | 2.303176                | 0.281460  | 1.646834  |
| 10            | 1             | 0           | 1.309421                | 1.728723  | 1.698209  |
| 11            | 6             | 0           | 0.184699                | -1.278784 | 0.707517  |
| 12            | 1             | 0           | -0.478409               | -2.074734 | 1.006263  |
| 13            | 6             | 0           | 1.848248                | -0.430180 | -0.951274 |
| 14            | 1             | 0           | 2.915311                | -0.533635 | -1.136709 |
| 15            | 1             | 0           | 1.351737                | -0.452782 | -1.916051 |
| 16            | 1             | 0           | -0.430777               | 0.039376  | 2.262042  |
| 17            | 1             | 0           | 2.396698                | 1.598112  | -0.524337 |
| 18            | 6             | 0           | 1.373776                | -1.619350 | -0.119845 |
| 19            | 1             | 0           | 2.175652                | -1.929110 | 0.556128  |
| 20            | 1             | 0           | 1.164565                | -2.468620 | -0.762499 |
| 21            | 8             | 0           | -1.055195               | -0.846180 | -0.960098 |
| 22            | 7             | 0           | -1.682530               | 0.144977  | -0.448158 |
| 23            | 6             | 0           | -2.912183               | -0.194507 | 0.220247  |
| 24            | 1             | 0           | -2.674394               | -0.815322 | 1.085603  |
| 25            | 1             | 0           | -3.433639               | 0.701345  | 0.534894  |
| 26            | 1             | 0           | -3.527913               | -0.762917 | -0.464455 |
